# Supplementary material for: Cu(ii) catalyzed oxidation-[3+2] cycloaddition-aromatization cascade: Efficient synthesis of pyrrolo [2, 1-a] isoquinolines
Source: Royal Society of Chemistry journal article supplement (doi:10.1039/c0cc03186k), 2010-11-12

## **Cu(II) catalyzed oxidation-[3+2] cycloaddition-aromatization cascade: Efficient synthesis of pyrrolo [2, 1-*a*] isoquinolines**

*Chenguang Yu,<sup>a,b</sup> Yinan Zhang,<sup>a</sup> Shilei Zhang,<sup>a</sup> Hao Li,<sup>c</sup> and Wei Wang<sup>a,c,\*</sup>*

<sup>a</sup> Department of Chemistry and Chemical Biology, University of New Mexico, Albuquerque, NM, 87131-0001, USA

<sup>b</sup> State Key Laboratory of Chemical Resources Engineering, Beijing University of Chemical Technology, Beijing 100029, China

<sup>c</sup> Shanghai Institute of Materia Medica, Chinese Academy of Sciences, 555 Zuchongzhi Road, Shanghai 201203, China

**General information:** Commercial reagents were used as received, unless otherwise stated. Merck 60 silica gel was used for chromatography, and Whatman silica gel plates with fluorescence F254 were used for thin-layer chromatography (TLC) analysis.  $^1\text{H}$  and  $^{13}\text{C}$  NMR spectra were recorded on Broker Avance 500, and tetramethylsilane (TMS) was used as a reference. Data for  $^1\text{H}$  are reported as follows: chemical shift (ppm), and multiplicity (s = singlet, d = doublet, t = triplet, q = quartet, m = multiplet). Data for  $^{13}\text{C}$  NMR are reported as ppm.

**General procedure for the synthesis of lamellarin-type molecules:** To a solution of an ethyl 2-(3,4-dihydroisoquinolin-2(1*H*)-yl)acetate (0.1 mmol) and 60  $\mu\text{L}$  of TBHP (3.3 equiv.) in the presence of 10 mol % catalyst  $\text{CuBr}_2$  in toluene (1.0 mL) was added a *N*-substituted maleimides (or other dipolarphiles) (0.1 mmol) and the resulting solution was stirred for 48 h at 50  $^\circ\text{C}$ . The reaction mixture was directly purified by silica gel chromatography without work-up and fractions were collected and concentrated *in vacuo* to provide the pure desired products.

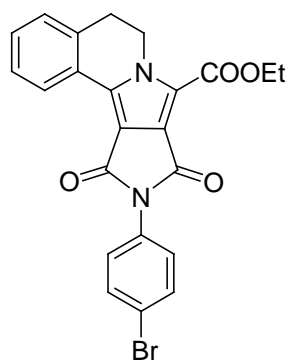

**Ethyl 10-(4-bromophenyl)-9,11-dioxo-6,9,10,11-tetrahydro-5H-pyrrolo [3',4':3,4] pyrrolo [2,1-a] isoquinoline-8-carboxylate (5a) (Table 2, entry 7):** White solid; Yield: 76%;  $^1\text{H-NMR}$  (500 MHz,  $\text{CDCl}_3$ ):  $\delta$  = 8.52 (t, 1H,  $J$  = 6.5 Hz), 7.58 (d, 2H,  $J$  = 8.5 Hz), 7.35-7.40 (m, 2H), 7.27-7.31 (m, 3H), 4.73 (t, 2H,  $J$  = 7.0 Hz), 4.40 (q, 2H,  $J$  = 7.0 Hz), 3.15 (t, 2H,  $J$  = 7.0 Hz), 1.45 (t, 3H,  $J$  = 7.5 Hz);  $^{13}\text{C}$  NMR (125 MHz,  $\text{CDCl}_3$ ):  $\delta$  = 162.6, 161.1, 159.4, 133.5, 132.4, 131.9, 131.6, 130.4, 128.5, 127.9, 127.8, 127.6, 125.3, 124.8, 121.3, 118.7, 115.9, 61.6, 43.3, 28.2, 14.1. HR-MS: calcd ( $\text{M} + \text{Na}^+$ ) for  $\text{C}_{23}\text{H}_{17}\text{BrN}_2\text{O}_4$ , 487.0269; found 487.0273.

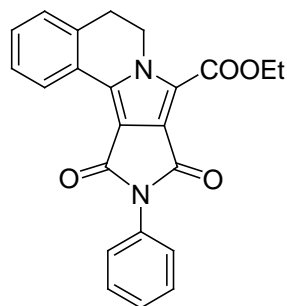

**Ethyl 9,11-dioxo-10-phenyl-6,9,10,11-tetrahydro-5H cyclopenta [3,4] pyrrolo [2,1-a] isoquinoline-8-carboxylate (5b) (Table 2, entry 1):** White solid; Yield: 57%;  $^1\text{H-NMR}$  (500 MHz,  $\text{CDCl}_3$ ):  $\delta$  = 8.58 (d, 1H,  $J$  = 7.0 Hz), 7.49 (t, 1H,  $J$  = 7.5 Hz), 7.36-7.41 (m, 5H), 7.29 (d, 1H,  $J$  = 7.0 Hz), 4.78 (t, 2H,  $J$  = 7.0 Hz), 4.43 (q, 2H,  $J$  = 7.0 Hz), 3.19 (d, 2H,  $J$  = 6.5 Hz), 1.47 (t, 3H,  $J$  = 7.0 Hz);  $^{13}\text{C}$  NMR (125 MHz,  $\text{CDCl}_3$ ):  $\delta$  = 163.1, 161.6, 159.7, 133.5, 132.6, 132.4,

130.3, 128.9, 128.0, 127.9, 127.8, 127.7, 127.1, 125.6, 125.2, 118.7, 116.2, 61.6, 43.4, 28.3, 14.2.  
HR-MS: calcd ( $M + Na^+$ ) for  $C_{23}H_{18}N_2O_4$ , 409.1164; found 409.1169.

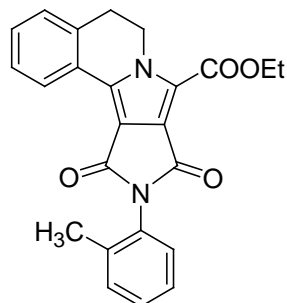

**Ethyl 9,11-dioxo-10-(o-tolyl)-6,9,10,11-tetrahydro-5H-pyrrolo[3',4':3,4]pyrrolo[2,1-a]isoquinoline-8-carboxylate (5c)** (Table 2, entry 2): White solid; Yield: 60%;  $^1H$ -NMR (500 MHz,  $CDCl_3$ ):  $\delta$  = 8.57 (t, 1H,  $J$  = 7.5 Hz), 7.29-7.42 (m, 6H), 7.21 (d, 1H,  $J$  = 7.5 Hz), 4.84 (m, 1H), 4.74 (m, 1H), 4.42 (q, 2H,  $J$  = 7.5 Hz), 3.20 (t, 2H,  $J$  = 6.5 Hz), 2.25 (s, 3H), 1.46 (t, 3H,  $J$  = 7.0 Hz);  $^{13}C$  NMR (125 MHz,  $CDCl_3$ ):  $\delta$  = 163.1, 161.7, 159.7, 136.9, 134.4, 132.4, 131.6, 130.9, 130.3, 129.1, 128.0, 127.6, 126.7, 125.6, 118.6, 116.4, 61.6, 43.4, 28.4, 18.0, 14.1. HR-MS: calcd ( $M + Na^+$ ) for  $C_{24}H_{20}N_2O_4$ , 423.1321; found 423.1316.

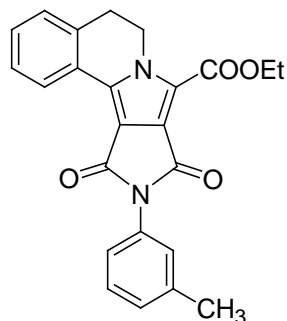

**Ethyl 9,11-dioxo-10-(m-tolyl)-6,9,10,11-tetrahydro-5H-pyrrolo [3',4':3,4] pyrrolo [2,1-a] isoquinoline-8-carboxylate (5d)** (Table 2, entry 3): White solid; Yield: 77%;  $^1H$ -NMR (500 MHz,  $CDCl_3$ ):  $\delta$  = 8.58 (d, 1H,  $J$  = 7.0 Hz), 7.35-7.42 (m, 3H), 7.29 (d, 1H,  $J$  = 7.0 Hz), 7.19-7.21 (m, 3H), 4.78 (t, 2H,  $J$  = 7.0 Hz), 4.43 (q, 2H,  $J$  = 7.0 Hz), 3.18 (t, 2H,  $J$  = 7.0 Hz), 2.40 (s, 3H), 1.47 (t, 3H,  $J$  = 7.5 Hz);  $^{13}C$  NMR (125 MHz,  $CDCl_3$ ):  $\delta$  = 163.2, 161.7, 159.7, 138.8, 133.4, 132.4, 130.3, 128.7, 128.0, 127.8, 127.6, 125.6, 125.3, 124.3, 118.6, 116.3, 61.6, 43.4, 28.3, 21.4, 14.2. HR-MS: calcd ( $M + Na^+$ ) for  $C_{24}H_{20}N_2O_4$ , 423.1321; found 423.1322.

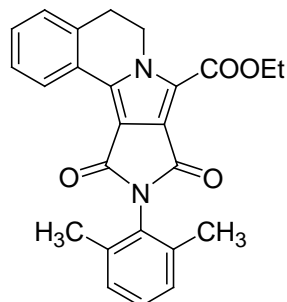

**Ethyl 10-(2,6-dimethylphenyl)-9,11-dioxo-6,9,10,11-tetrahydro-5H-pyrrolo [3',4':3,4] pyrrolo [2,1-a] isoquinoline-8-carboxylate (5e)** (Table 2, entry 4): White solid; Yield: 50%;

$^1\text{H-NMR}$  (500 MHz,  $\text{CDCl}_3$ ):  $\delta$  = 8.58 (d, 1H,  $J$  = 7.5 Hz), 7.36-7.42 (m, 2H), 7.30 (d, 1H,  $J$  = 7.0 Hz), 7.24 (t, 1H,  $J$  = 7.5 Hz), 7.15-7.17 (m, 2H), 4.80 (t, 2H,  $J$  = 7.0 Hz), 4.42 (q, 2H,  $J$  = 7.0 Hz), 3.20 (d, 2H,  $J$  = 6.5 Hz), 2.21 (s, 3H), 1.46 (t, 3H,  $J$  = 7.0 Hz);  $^{13}\text{C NMR}$  (125 MHz,  $\text{CDCl}_3$ ):  $\delta$  = 163.0, 161.4, 159.7, 137.1, 134.3, 133.3, 132.4, 130.8, 130.3, 129.1, 128.3, 128.0, 127.6, 125.6, 118.6, 116.5, 61.7, 43.4, 28.4, 18.1, 14.1. HR-MS: calcd ( $\text{M} + \text{Na}^+$ ) for  $\text{C}_{25}\text{H}_{22}\text{N}_2\text{O}_4$ , 437.1477; found 437.1484.

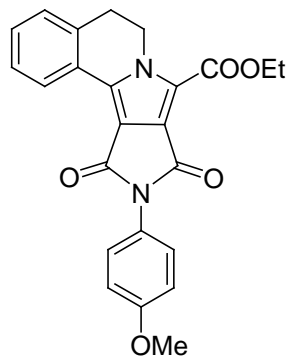

**Ethyl 10-(4-methoxyphenyl)-9,11-dioxo-6,9,10,11-tetrahydro-5H-pyrrolo [3',4':3,4] pyrrolo [2,1-a] isoquinoline-8-carboxylate (5f)** (Table 2, entry 5): White solid; Yield: 64%;  $^1\text{H-NMR}$  (500 MHz,  $\text{CDCl}_3$ ):  $\delta$  = 8.57 (d, 1H,  $J$  = 7.0 Hz), 7.36-7.42 (m, 2H), 7.28-7.31 (m, 2H), 7.27-7.31 (m, 3H), 7.00 (d, 2H,  $J$  = 9.0 Hz), 4.77 (t, 2H,  $J$  = 7.0 Hz), 4.42 (q, 2H,  $J$  = 7.0 Hz), 3.84 (s, 3H), 3.18 (t, 2H,  $J$  = 6.5 Hz), 1.46 (t, 3H,  $J$  = 7.5 Hz);  $^{13}\text{C NMR}$  (125 MHz,  $\text{CDCl}_3$ ):  $\delta$  = 163.4, 162.0, 159.7, 159.0, 133.4, 132.4, 130.3, 128.5, 128.2, 128.0, 127.9, 127.6, 125.6, 125.3, 118.6, 116.3, 114.3, 61.6, 55.5, 43.3, 28.3, 14.2. HR-MS: calcd ( $\text{M} + \text{Na}^+$ ) for  $\text{C}_{24}\text{H}_{20}\text{N}_2\text{O}_5$ , 439.1270; found 439.1276.

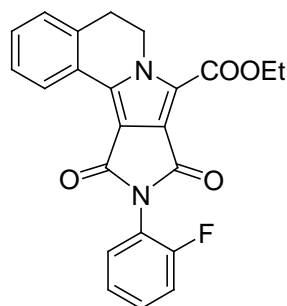

**Ethyl 10-(2-fluorophenyl)-9,11-dioxo-6,9,10,11-tetrahydro-5H-pyrrolo [3',4':3,4] pyrrolo [2,1-a] isoquinoline-8-carboxylate (5g)** (Table 2, entry 6): White solid; Yield: 61%;  $^1\text{H-NMR}$  (500 MHz,  $\text{CDCl}_3$ ):  $\delta$  = 8.57 (t, 1H,  $J$  = 6.5 Hz), 7.35-7.43 (m, 4H), 7.23-7.30 (m, 4H), 4.79 (t, 2H,  $J$  = 7.0 Hz), 4.43 (q, 2H,  $J$  = 7.0 Hz), 3.19 (d, 2H,  $J$  = 6.5 Hz), 1.46 (t, 3H,  $J$  = 7.0 Hz);  $^{13}\text{C NMR}$  (125 MHz,  $\text{CDCl}_3$ ):  $\delta$  = 162.4, 160.9, 159.6, 159.2, 157.2, 133.6, 132.4, 130.4, 130.3, 128.0, 127.7, 125.5, 125.3, 124.5, 120.4, 120.3, 118.8, 116.6, 116.5, 116.2, 61.7, 43.4, 28.3, 14.15. HR-MS: calcd ( $\text{M} + \text{Na}^+$ ) for  $\text{C}_{23}\text{H}_{17}\text{FN}_2\text{O}_4$ , 427.1070; found 427.1074.

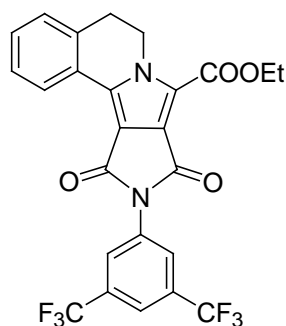

**Ethyl 10-(3,5-bis(trifluoromethyl)phenyl)-9,11-dioxo-6,9,10,11-tetrahydro-5H-pyrrolo[3',4':3,4]pyrrolo[2,1-a]isoquinoline-8-carboxylate (5h)** (Table 2, entry 8): White solid; Yield: 80%;  $^1\text{H-NMR}$  (500 MHz,  $\text{CDCl}_3$ ):  $\delta$  = 8.53 (d, 1H,  $J$  = 7.0 Hz), 8.00 (s, 1H), 7.87 (s, 1H), 7.40-7.45 (m, 2H), 7.31 (d, 1H,  $J$  = 7.0 Hz), 4.80 (t, 2H,  $J$  = 7.0 Hz), 4.46 (q, 2H,  $J$  = 7.0 Hz), 3.20 (t, 2H,  $J$  = 7.0 Hz), 1.48 (t, 3H,  $J$  = 7.0 Hz);  $^{13}\text{C NMR}$  (125 MHz,  $\text{CDCl}_3$ ):  $\delta$  = 162.1, 160.5, 159.4, 134.2, 134.1, 132.5, 132.4, 130.7, 128.1, 127.9, 127.8, 126.8, 125.2, 124.3, 124.1, 121.9, 120.9, 119.3, 115.4, 61.9, 43.6, 28.3, 14.2. HR-MS: calcd ( $\text{M} + \text{Na}^+$ ) for  $\text{C}_{25}\text{H}_{16}\text{F}_6\text{N}_2\text{O}_4$ , 545.0912; found 545.0910.

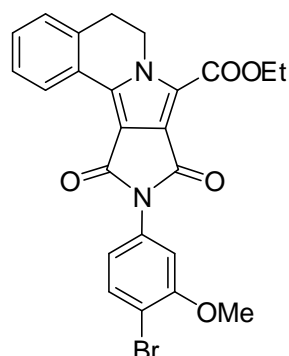

**Ethyl 10-(4-bromo-3-methoxyphenyl)-9,11-dioxo-6,9,10,11-tetrahydro-5H-pyrrolo[3',4':3,4]pyrrolo[2,1-a]isoquinoline-8-carboxylate (5i)** (Table 2, entry 9): White solid; Yield: 70%;  $^1\text{H-NMR}$  (500 MHz,  $\text{CDCl}_3$ ):  $\delta$  = 8.54 (d, 1H,  $J$  = 7.0 Hz), 8.62 (d, 1H,  $J$  = 8.5 Hz), 7.37-7.41 (m, 2H), 7.29 (d, 1H,  $J$  = 6.5 Hz), 6.98 (s, 1H), 6.91-6.98 (m, 1H), 4.77 (t, 2H,  $J$  = 7.0 Hz), 4.42 (t, 2H,  $J$  = 7.0 Hz), 3.91 (s, 3H), 3.19 (d, 2H,  $J$  = 6.0 Hz), 1.46 (t, 3H,  $J$  = 7.0 Hz);  $^{13}\text{C NMR}$  (125 MHz,  $\text{CDCl}_3$ ):  $\delta$  = 162.7, 161.3, 159.5, 156.0, 133.6, 133.1, 132.9, 132.4, 130.4, 128.0, 127.9, 127.7, 125.4, 124.9, 120.4, 118.8, 116.0, 111.1, 110.9, 61.7, 56.4, 43.4, 28.3, 14.2.

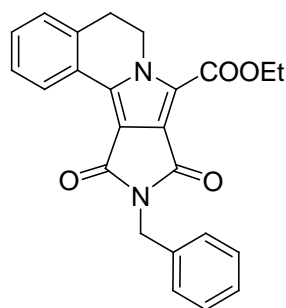

**Ethyl 10-benzyl-9,11-dioxo-6,9,10,11-tetrahydro-5H-pyrrolo[3',4':3,4]pyrrolo[2,1-a]isoquinoline-8-carboxylate (5j)** (Table 2, entry 10): White solid; Yield: 66%;  $^1\text{H-NMR}$  (500 MHz,  $\text{CDCl}_3$ ):  $\delta$  = 8.52 (d, 1H,  $J$  = 7.5 Hz), 7.44 (d, 2H,  $J$  = 7.5 Hz), 7.34-7.41 (m, 3H), 7.31 (t,

2H,  $J = 7.5$  Hz), 7.25 (d, 1H,  $J = 8.5$ Hz), 4.80 (s, 2H), 4.72 (t, 2H,  $J = 7.0$  Hz), 4.43 (q, 2H,  $J = 7.0$  Hz), 3.14 (t, 2H,  $J = 6.5$  Hz), 1.48 (t, 3H,  $J = 7.0$  Hz);  $^{13}\text{C}$  NMR (125 MHz,  $\text{CDCl}_3$ ):  $\delta = 163.8, 162.3, 159.7, 137.1, 133.0, 132.3, 130.2, 128.5, 128.4, 127.9, 127.8, 127.6, 127.5, 125.6, 125.5, 118.3, 116.5, 61.6, 43.3, 41.8, 28.3, 14.2$ . HR-MS: calcd ( $\text{M} + \text{Na}^+$ ) for  $\text{C}_{24}\text{H}_{20}\text{N}_2\text{O}_4$ , 423.1321; found 423.1325.

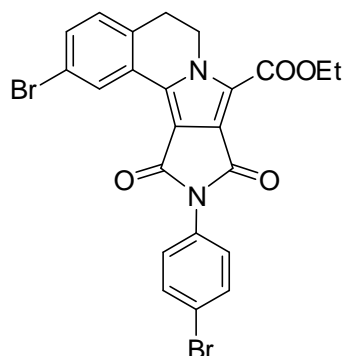

**Ethyl 2-bromo-10-(4-bromophenyl)-9,11-dioxo-6,9,10,11-tetrahydro-5H-pyrrolo [3',4':3,4] pyrrolo [2,1-a] isoquinoline-8-carboxylate (5k)** (Table 2, entry 11): White solid; Yield: 81%;  $^1\text{H}$ -NMR (500 MHz,  $\text{CDCl}_3$ ):  $\delta = 8.72$  (d, 1H,  $J = 2.0$  Hz), 7.61 (d, 2H,  $J = 8.5$  Hz), 7.48-7.62 (m, 1H), 7.31 (d, 2H,  $J = 8.5$  Hz), 7.17 (d, 1H,  $J = 8.0$  Hz), 4.78 (t, 2H,  $J = 7.0$  Hz), 4.43 (q, 2H,  $J = 7.0$  Hz), 3.14 (t, 2H,  $J = 6.5$  Hz), 1.46 (t, 3H,  $J = 7.0$  Hz);  $^{13}\text{C}$  NMR (125 MHz,  $\text{CDCl}_3$ ):  $\delta = 162.5, 161.0, 159.4, 133.7, 133.2, 131.5, 131.0, 130.4, 129.3, 128.5, 127.2, 121.7, 121.6, 119.3, 61.8, 43.3, 27.9, 14.2$ .

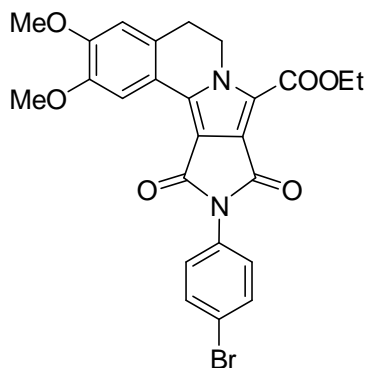

**Ethyl 10-(4-bromophenyl)-2,3-dimethoxy-9,11-dioxo-6,9,10,11-tetrahydro-5H-pyrrolo[3',4':3,4]pyrrolo[2,1-a]isoquinoline-8-carboxylate (5l)** (Table 2, entry 12): Yellow solid; Yield: 72%;  $^1\text{H}$ -NMR (500 MHz,  $\text{CDCl}_3$ ):  $\delta = 8.23$  (s, 1H), 7.61 (d, 2H,  $J = 9.0$  Hz), 7.29 (d, 2H,  $J = 9.0$  Hz), 6.78 (s, 1H), 4.75 (t, 2H,  $J = 7.0$  Hz), 4.43 (q, 2H,  $J = 7.0$  Hz), 3.99 (s, 3H), 3.94 (s, 3H), 1.46 (t, 3H,  $J = 7.5$  Hz);  $^{13}\text{C}$  NMR (125 MHz,  $\text{CDCl}_3$ ):  $\delta = 163.2, 161.3, 159.6, 150.8, 148.6, 132.2, 128.8, 125.7, 124.8, 121.7, 118.6, 110.5, 110.3, 61.6, 56.2, 56.0, 43.6, 27.9, 14.2$ .

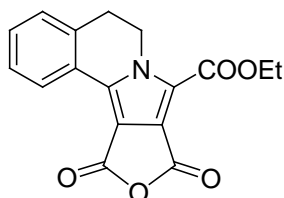

**Ethyl 9,11-dioxo-5,6,9,11-tetrahydrofuro [3',4':3,4] pyrrolo [2,1-a] isoquinoline-8-carboxylate (7a) (Table 3, entry 1):** White solid; Yield: 72%;  $^1\text{H-NMR}$  (500 MHz,  $\text{CDCl}_3$ ):  $\delta$  = 8.35 (d, 1H,  $J$  = 5 Hz), 7.42-7.43 (m, 2H), 7.31 (d, 1H,  $J$  = 4.5 Hz), 4.81 (t, 2H,  $J$  = 7.0 Hz), 4.44 (q, 2H,  $J$  = 7.0 Hz), 3.20 (t, 2H,  $J$  = 7.0 Hz), 1.47 (t, 3H,  $J$  = 7.0 Hz);  $^{13}\text{C NMR}$  (125 MHz,  $\text{CDCl}_3$ ):  $\delta$  = 159.0, 158.8, 156.9, 134.3, 132.3, 131.1, 128.3, 127.9, 127.7, 124.7, 124.5, 119.4, 119.4, 115.4, 62.0, 43.8, 28.0, 14.1. HR-MS: calcd ( $\text{M} + \text{Na}^+$ ) for  $\text{C}_{17}\text{H}_{13}\text{NO}_5$ , 334.0691; found 334.0692.

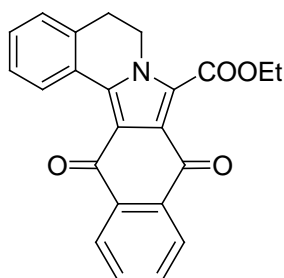

**Ethyl 9,14-dioxo-5,6,9,14-tetrahydrobenzo[5,6]isoindolo[1,2-a]isoquinoline-8-carboxylate (7b) (Table 3, entry 2):** Yellow solid; Yield: 72%;  $^1\text{H-NMR}$  (500 MHz,  $\text{CDCl}_3$ ):  $\delta$  = 9.00 (d, 1H,  $J$  = 2.5 Hz), 8.30 (dd, 1H,  $J_1$  = 1.5 Hz,  $J_2$  = 7.5 Hz), 8.21-8.23 (m, 1H), 7.67-7.74 (m, 2H), 7.46 (t, 1H,  $J$  = 7.0 Hz), 7.39 (t, 1H,  $J$  = 7.0 Hz), 7.26-7.28 (m, 1H), 4.55 (q, 2H,  $J$  = 7.0 Hz), 4.29 (t, 2H,  $J$  = 6.5 Hz), 3.11 (t, 2H,  $J$  = 6.5 Hz), 1.50 (t, 3H,  $J$  = 7.0 Hz);  $^{13}\text{C NMR}$  (125 MHz,  $\text{CDCl}_3$ ):  $\delta$  = 179.7, 179.5, 161.4, 135.7, 134.7, 133.6, 133.3, 133.0, 130.1, 128.8, 127.5, 127.4, 126.6, 126.4, 123.2, 117.4, 62.5, 43.2, 29.1, 14.0. HR-MS: calcd ( $\text{M} + \text{Na}^+$ ) for  $\text{C}_{23}\text{H}_{17}\text{NO}_4$ , 394.1055; found 394.1052.

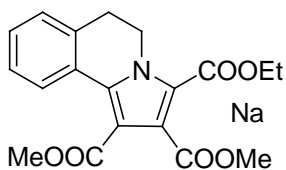

$\text{C}_{19}\text{H}_{19}\text{NNaO}_6$   
Exact Mass: 380.1110  
Mol. Wt.: 380.3470  
m/e: 380.1110 (100.0%),  
381.1144 (21.1%), 382.1177  
(2.1%), 382.1153 (1.2%)  
C, 60.00; H, 5.04; N, 3.68; Na,  
6.04; O, 25.24

**3-Ethyl 1,2-dimethyl 5,6-dihydropyrrolo [2,1-a] isoquinoline-1,2,3-tricarboxylate (7c) (Table 3, entry 3):** White solid; Yield: 68%;  $^1\text{H-NMR}$  (500 MHz,  $\text{CDCl}_3$ ):  $\delta$  = 8.15 (t, 1H,  $J$  = 4.5 Hz), 7.31-7.33 (m, 2H), 7.26 (d, 1H,  $J$  = 3.5 Hz), 4.55 (t, 2H,  $J$  = 6.5 Hz), 4.30 (q, 2H,  $J$  = 7.0 Hz), 3.92 (s, 3H), 3.83 (s, 3H), 3.30 (t, 2H,  $J$  = 6.5 Hz), 1.35 (t, 3H,  $J$  = 7.0 Hz);  $^{13}\text{C NMR}$  (125 MHz,  $\text{CDCl}_3$ ):  $\delta$  = 166.6, 163.8, 159.8, 136.8, 134.3, 129.3, 128.3, 127.4, 127.0, 126.7,

126.3, 119.0, 110.4, 61.1, 52.5, 51.8, 42.5, 29.3, 14.0. HR-MS: calcd ( $M + Na^+$ ) for  $C_{19}H_{19}NO_6$ , 380.1110; found 380.1111.

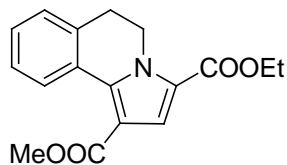

**3-Ethyl 1-methyl 5,6-dihydropyrrolo[2,1-a]isoquinoline-1,3-dicarboxylate (7d)** (Table 3, entry 4): White solid; Yield: 70%;  $^1H$ -NMR (500 MHz,  $CDCl_3$ ):  $\delta$  = 8.43 (d, 1H,  $J$  = 7.5 Hz), 7.49 (s, 1H), 7.28-7.36 (m, 2H), 7.24 (d, 1H,  $J$  = 7.5 Hz), 4.60 (t, 2H,  $J$  = 6.5 Hz), 4.32 (q, 2H,  $J$  = 7.0 Hz), 3.86 (s, 3H), 3.02 (t, 2H,  $J$  = 6.5 Hz), 1.38 (t, 3H,  $J$  = 7.0 Hz);  $^{13}C$  NMR (125 MHz,  $CDCl_3$ ):  $\delta$  = 165.0, 160.9, 137.8, 134.1, 128.9, 128.4, 127.3, 127.1, 127.0, 121.3, 121.1, 111.9, 60.3, 51.4, 42.3, 29.5, 14.4. HR-MS: calcd ( $M + Na^+$ ) for  $C_{17}H_{17}NO_4$ , 322.1055; found 322.1058.

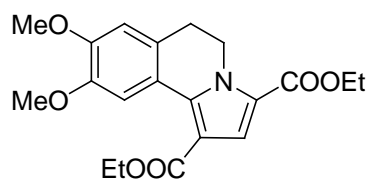

**Diethyl 8,9-dimethoxy-5,6-dihydropyrrolo[2,1-a]isoquinoline-1,3-dicarboxylate (7e)** (Table 3, entry 5): White solid; Yield: 37%;  $^1H$ -NMR (500 MHz,  $CDCl_3$ ):  $\delta$  = 8.35 (s, 1H), 7.47 (s, 1H), 6.72 (s, 1H), 4.58 (t, 2H,  $J$  = 6.5 Hz), 4.30 (q, 4H,  $J$  = 7.0 Hz), 3.95 (s, 3H), 3.90 (s, 3H), 2.94 (t, 2H,  $J$  = 6.5 Hz), 1.37 (t, 6H,  $J$  = 6.5 Hz);  $^{13}C$  NMR (125 MHz,  $CDCl_3$ ):  $\delta$  = 164.6, 160.9, 149.4, 147.5, 138.2, 127.2, 121.5, 120.6, 119.9, 112.3, 111.4, 110.2, 60.2, 60.1, 56.1, 55.9, 42.4, 28.9, 14.4, 14.4.



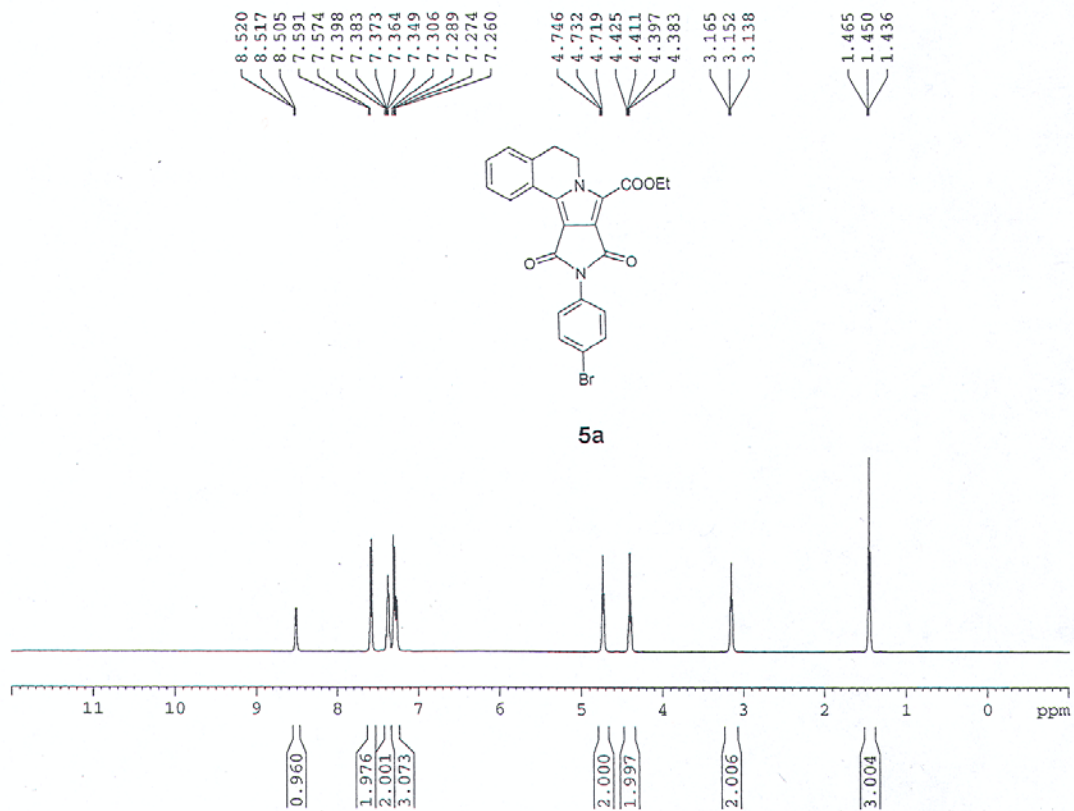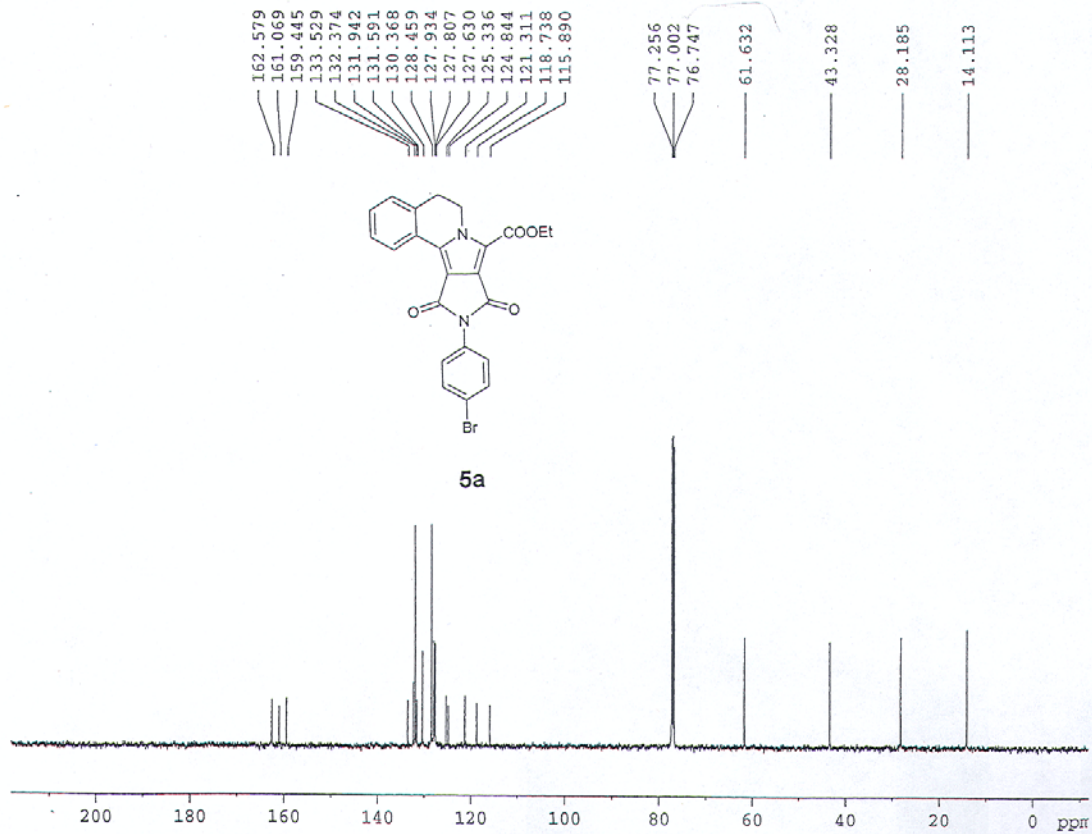

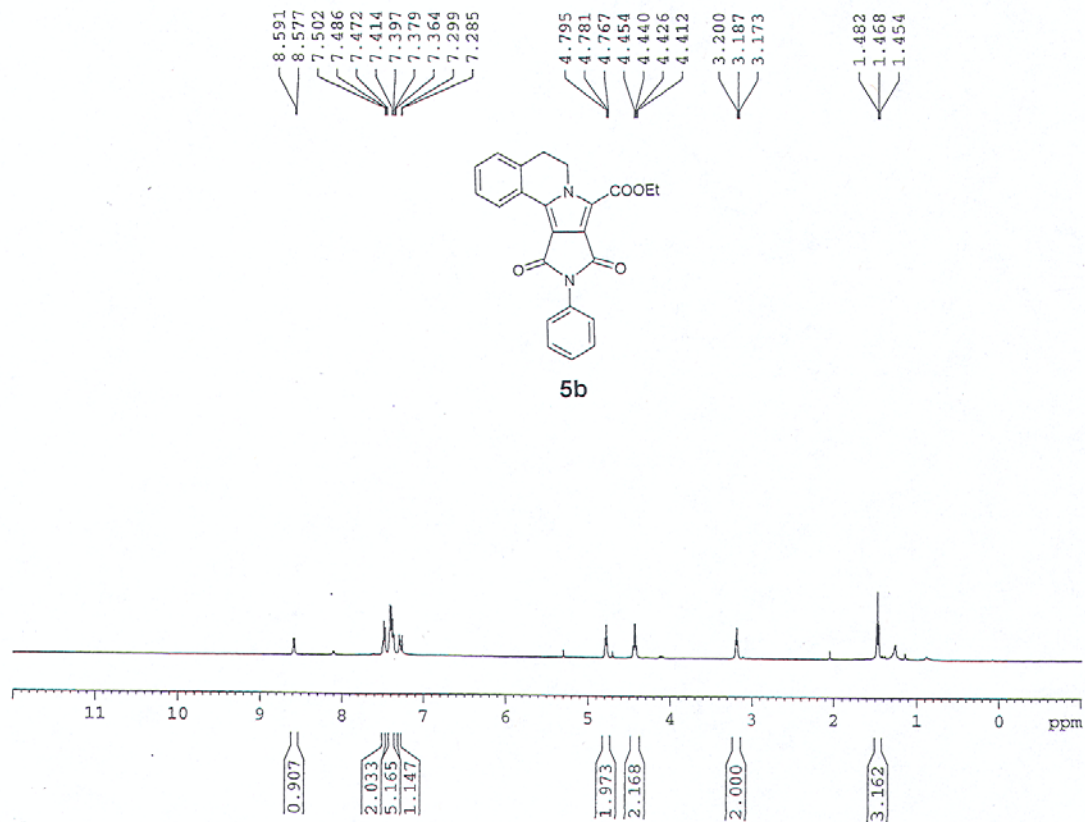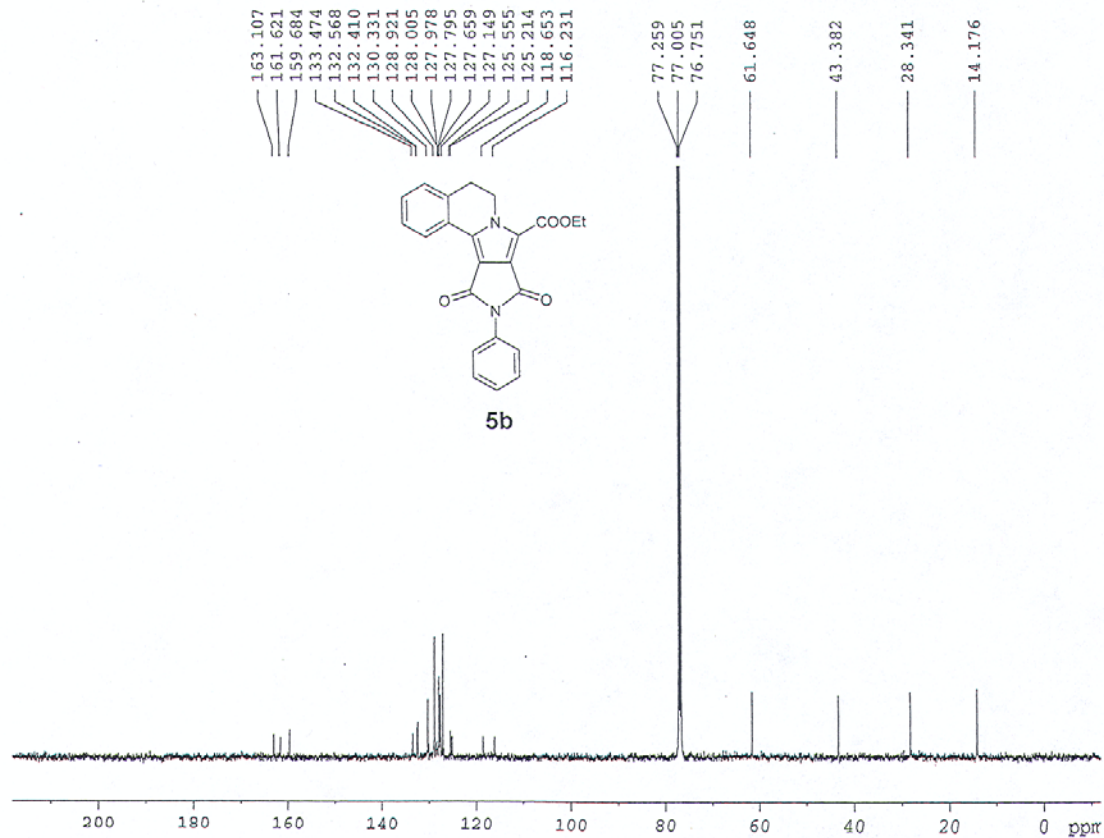

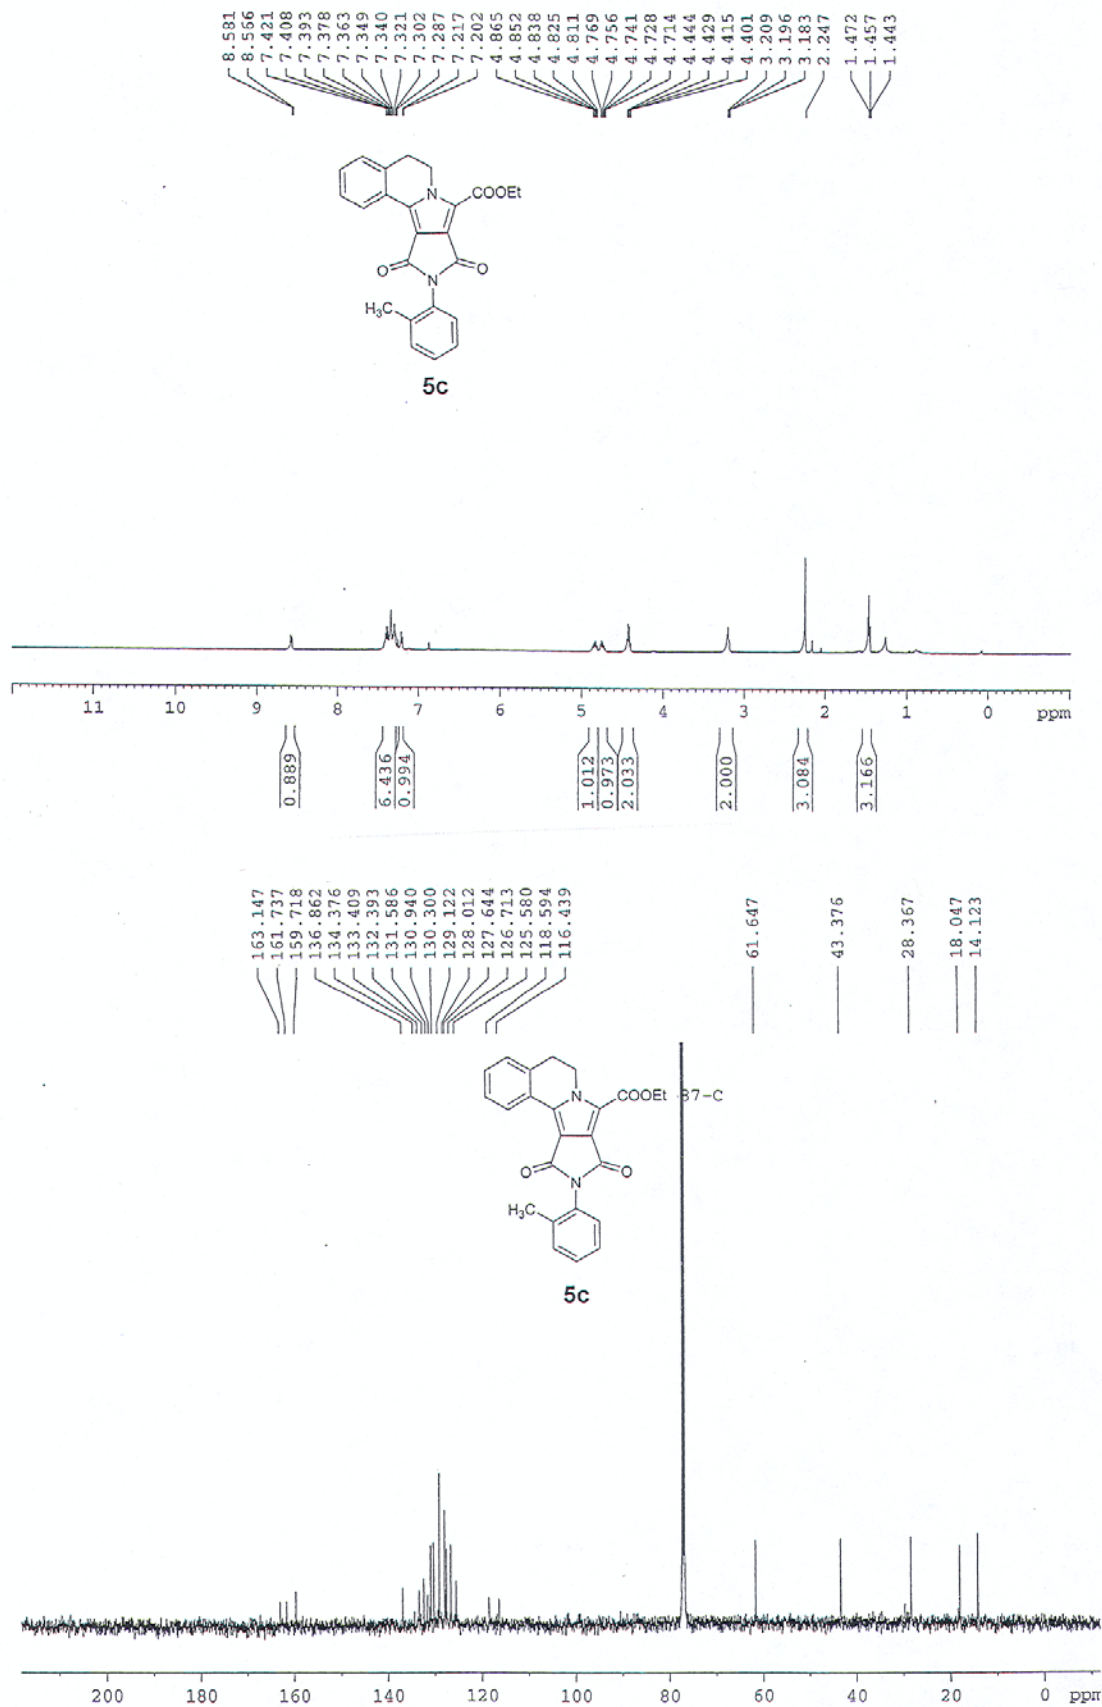

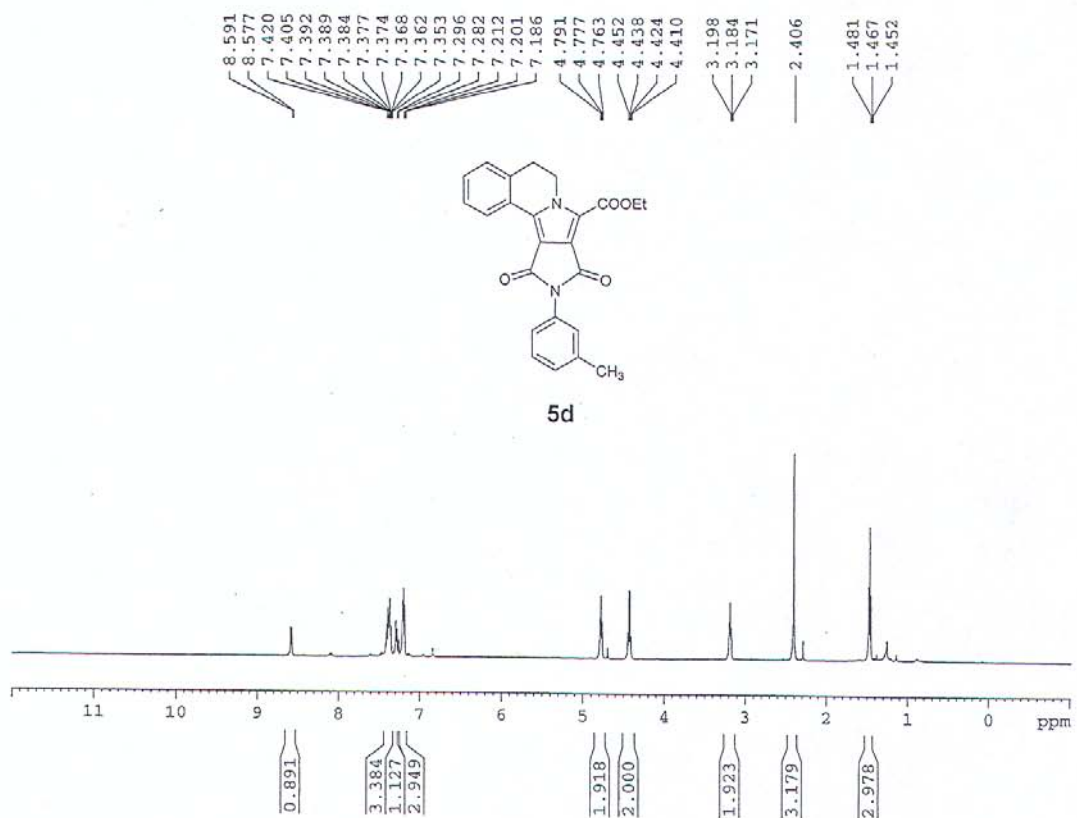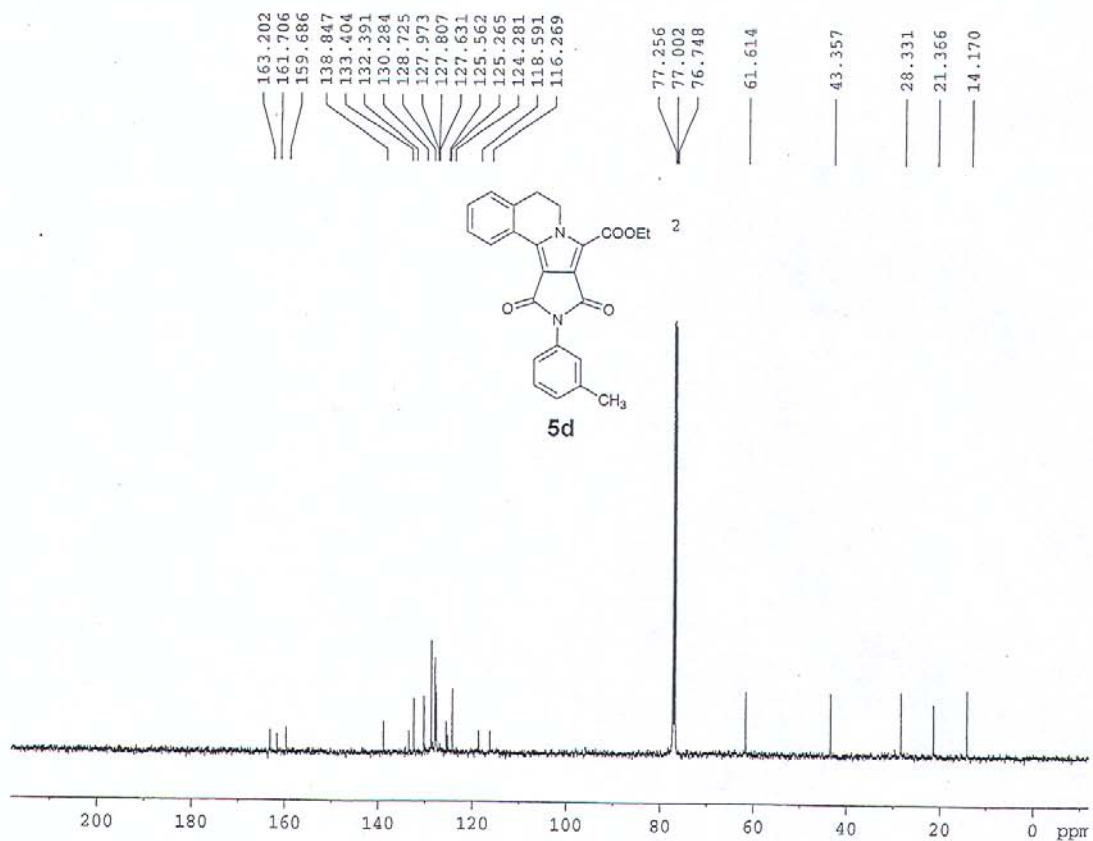

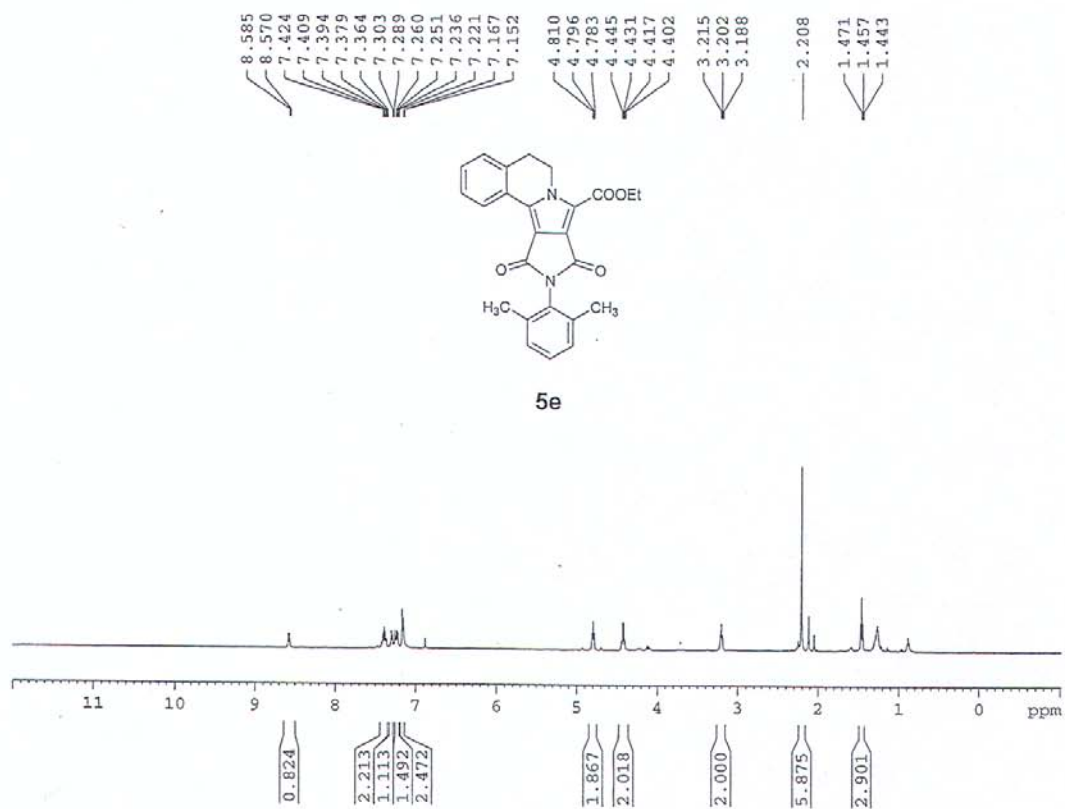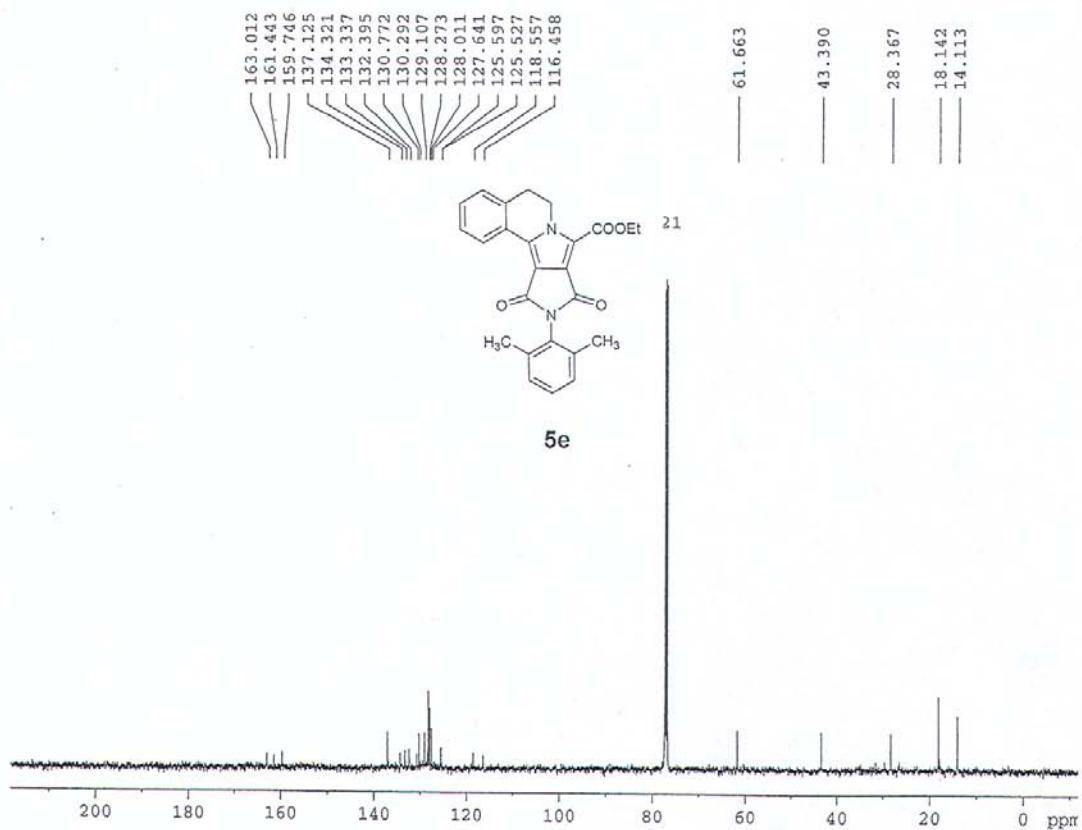



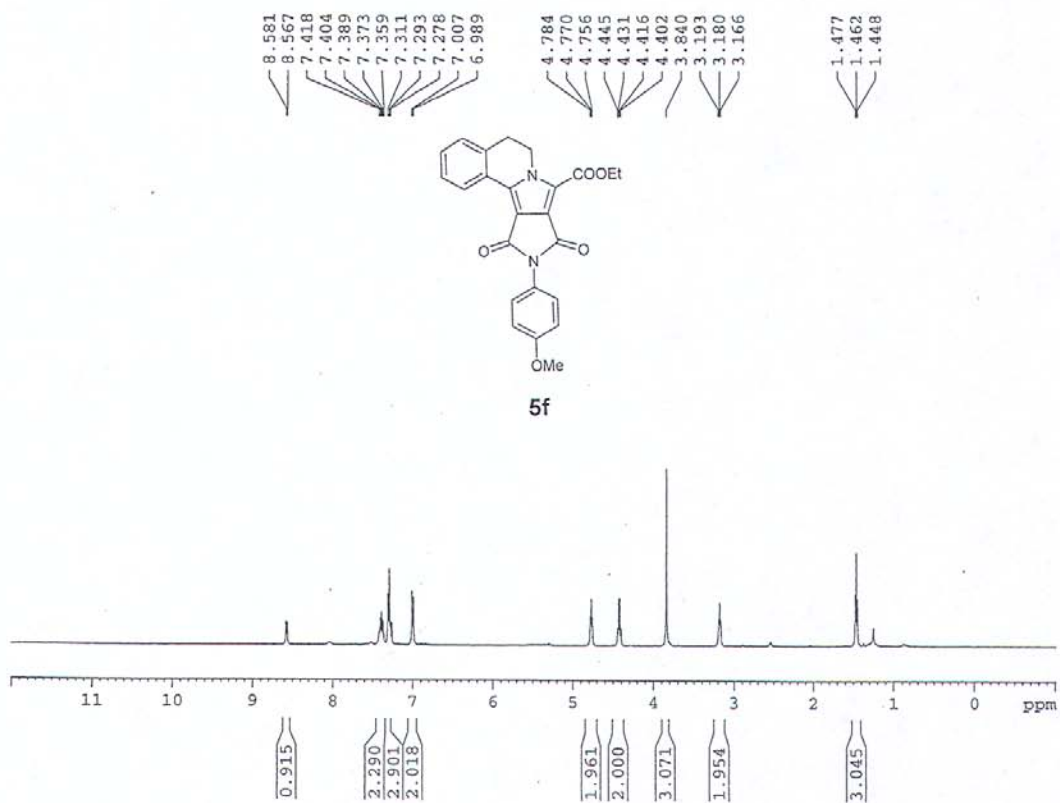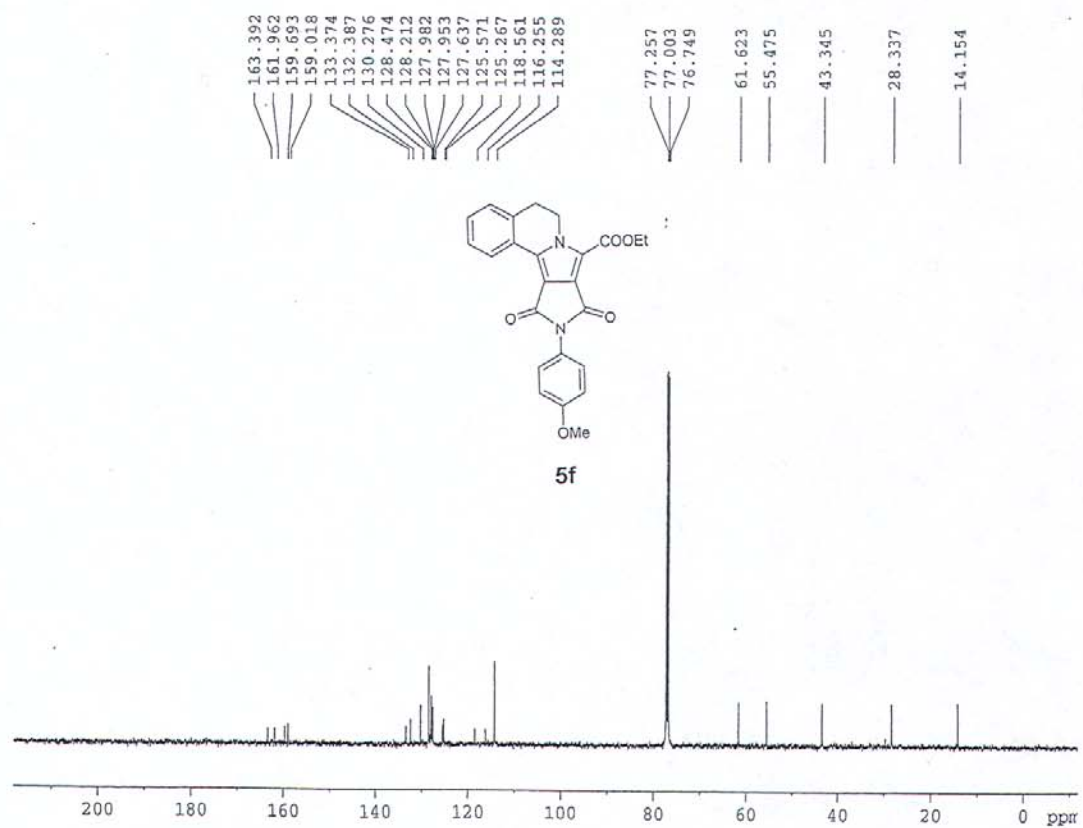

8.570  
8.567  
8.553  
7.436  
7.420  
7.405  
7.393  
7.390  
7.380  
7.365  
7.352  
7.298  
7.281  
7.263  
7.246  
7.243  
7.226  
4.800  
4.786  
4.772  
4.448  
4.434  
4.419  
4.405  
3.203  
3.190  
3.176  
1.476  
1.462  
1.448

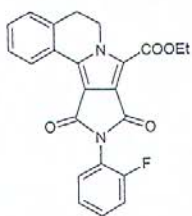

5g

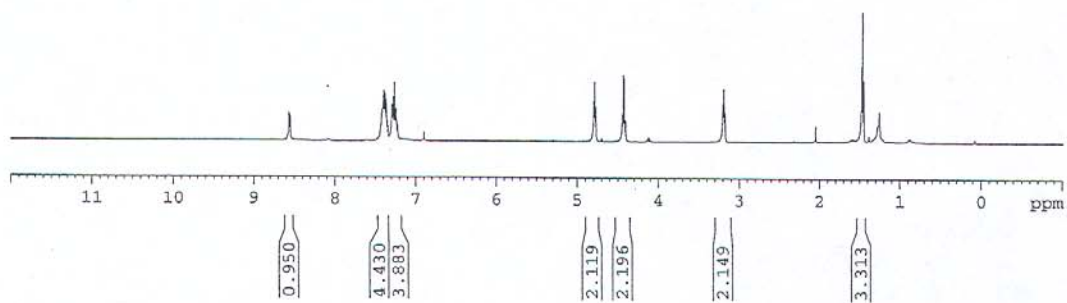

162.374  
160.928  
159.612  
159.175  
157.168  
133.636  
132.401  
130.388  
130.309  
128.007  
127.651  
125.469  
125.273  
124.454  
120.397  
120.293  
118.823  
116.641  
116.484  
116.225  
61.666  
43.394  
28.322  
14.146

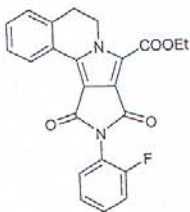

5g

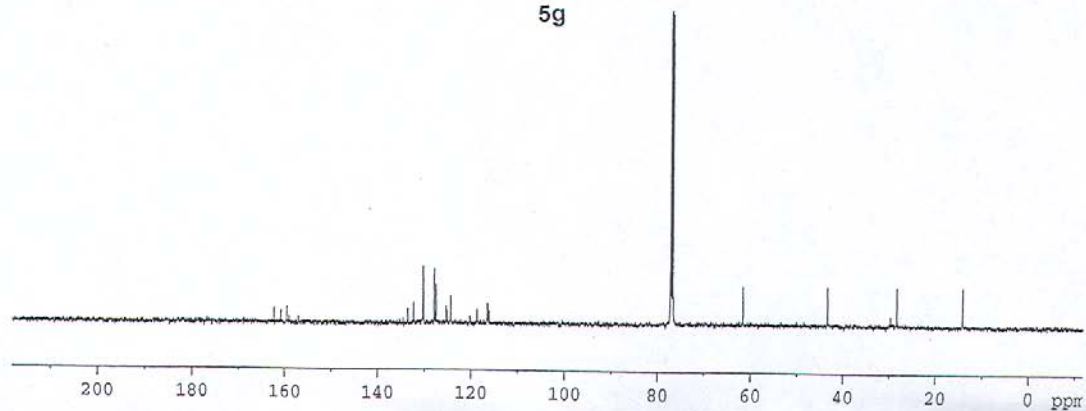

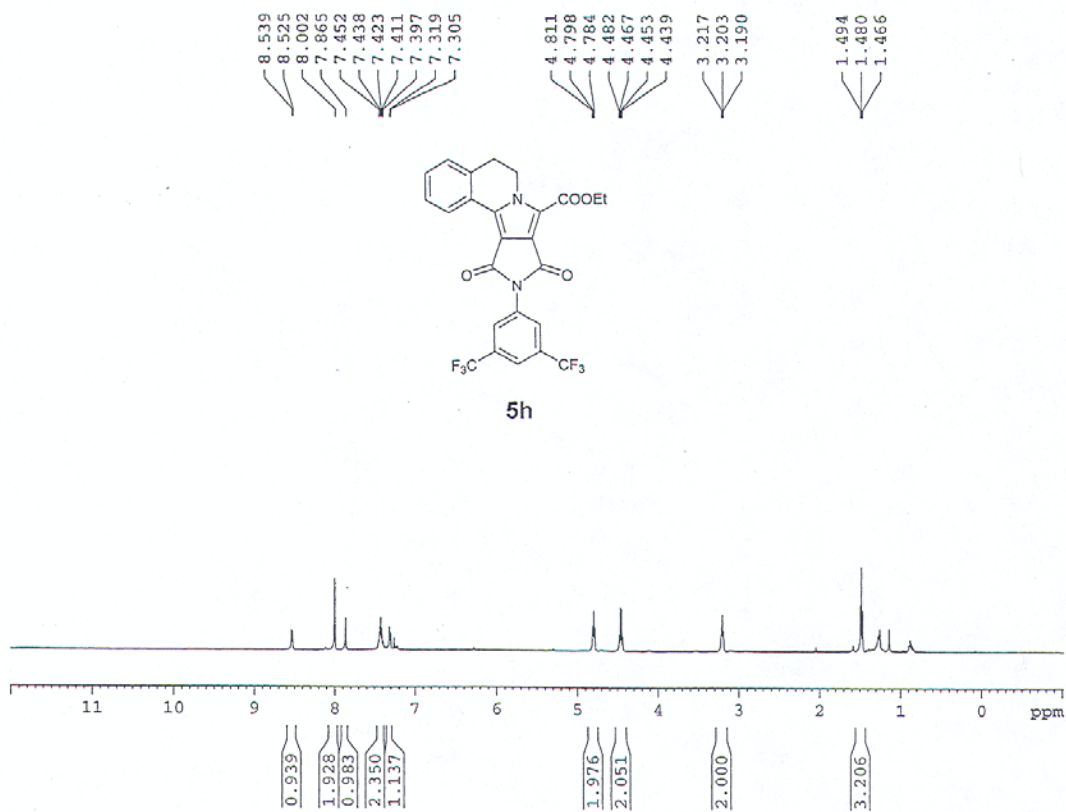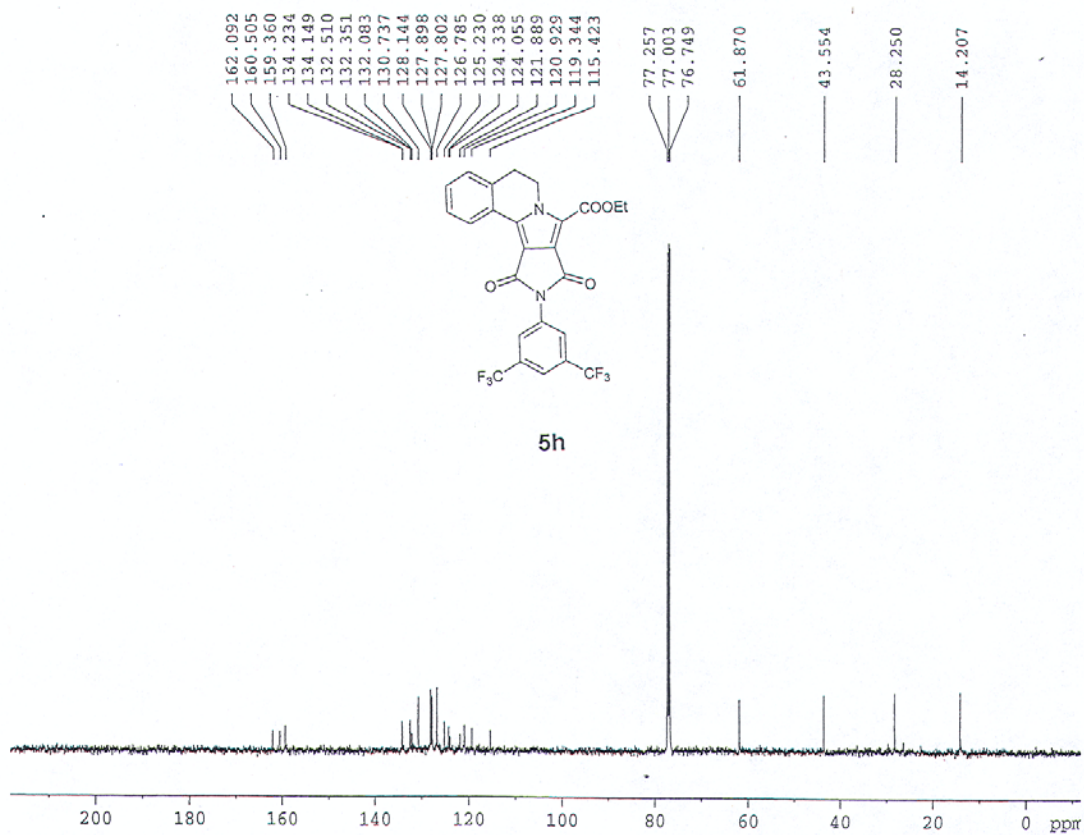



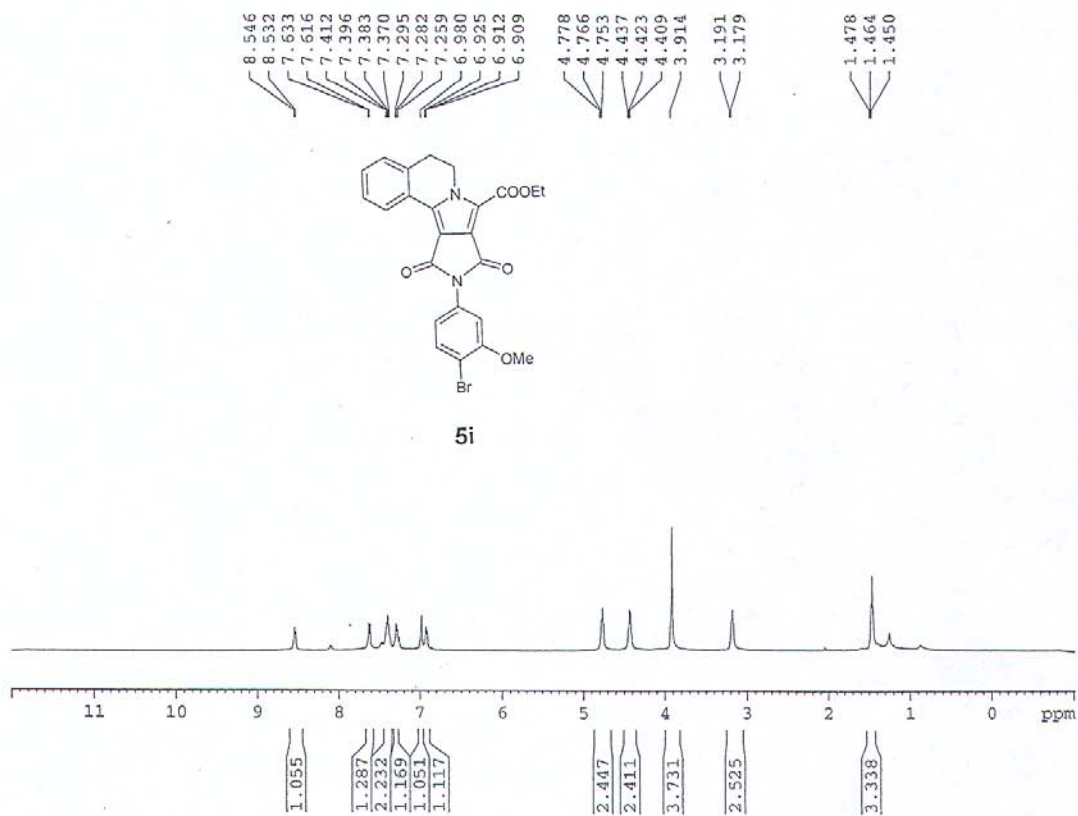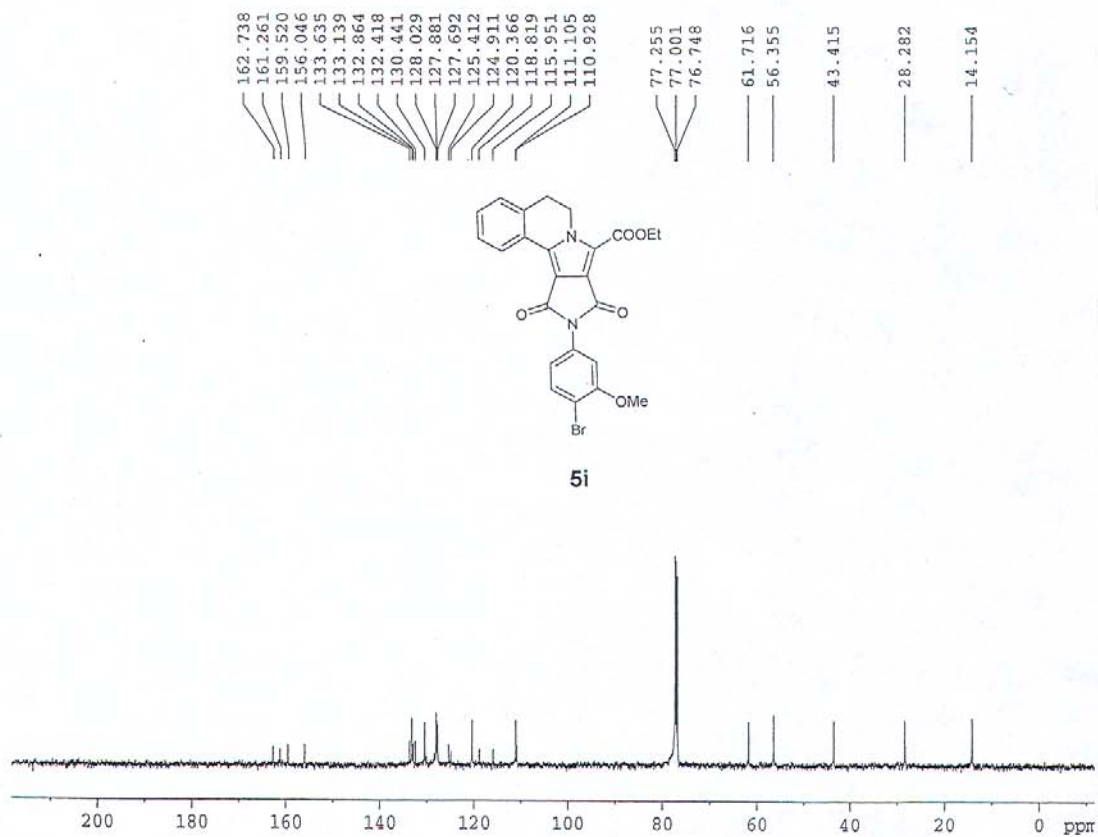

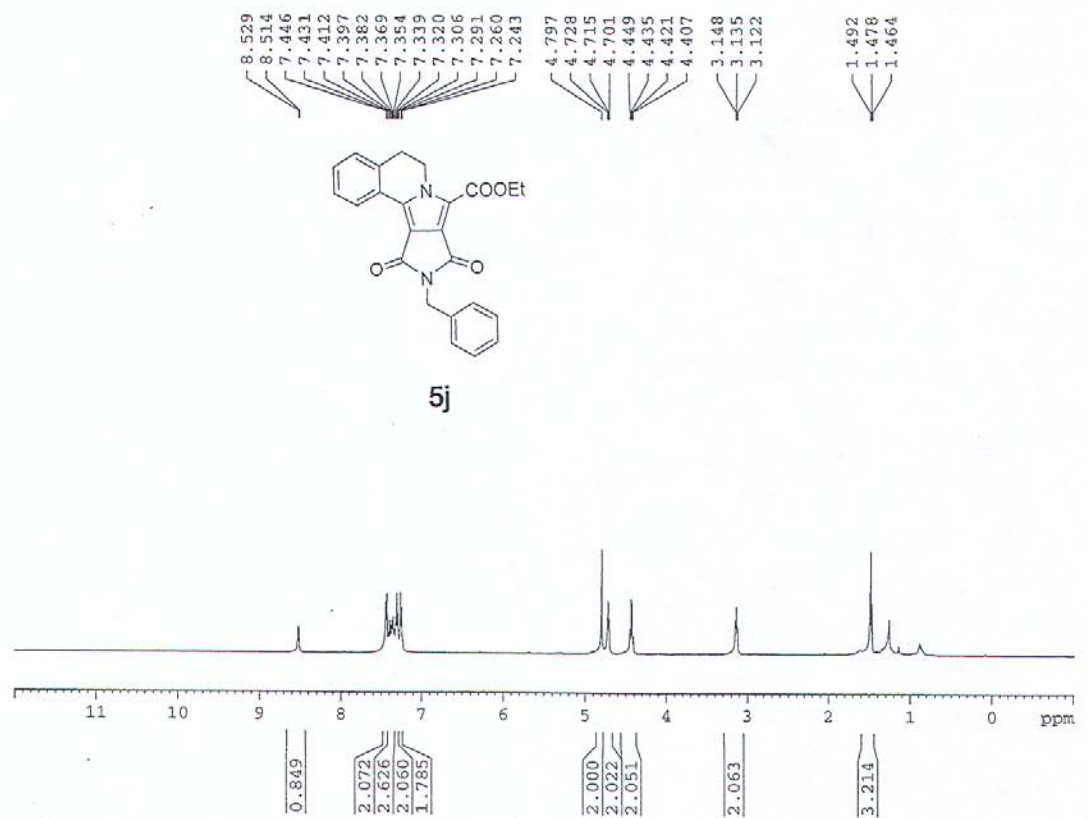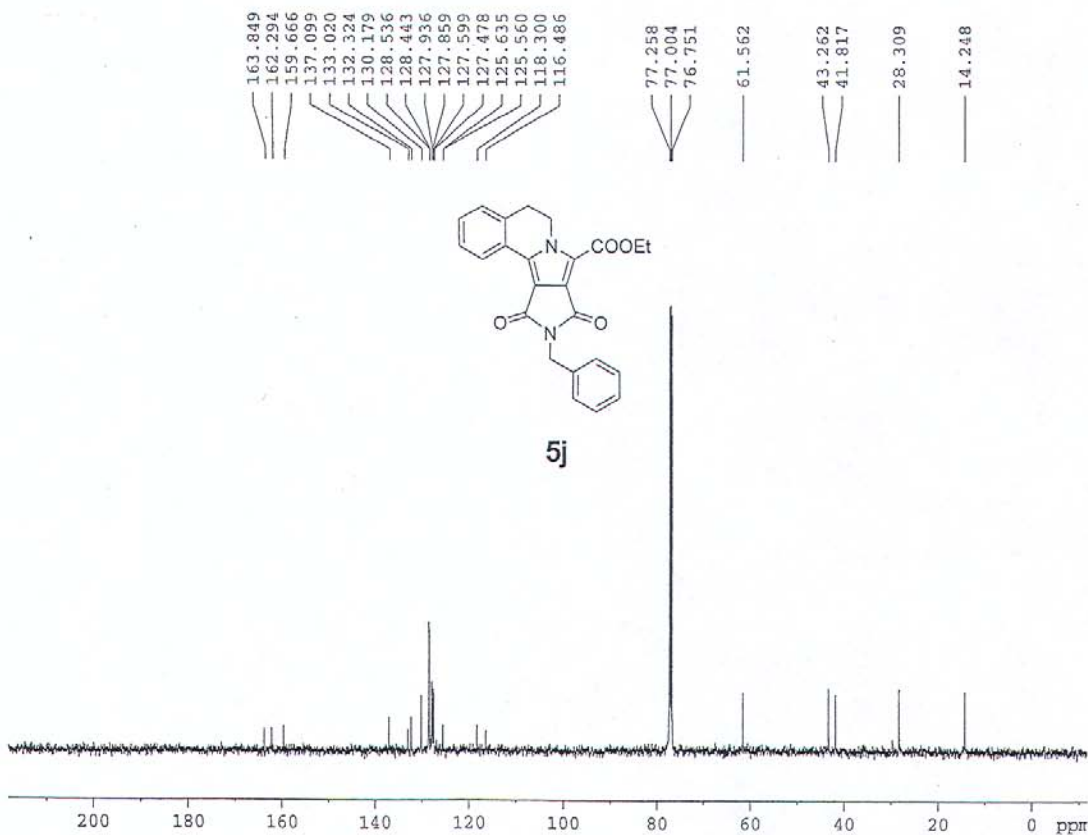

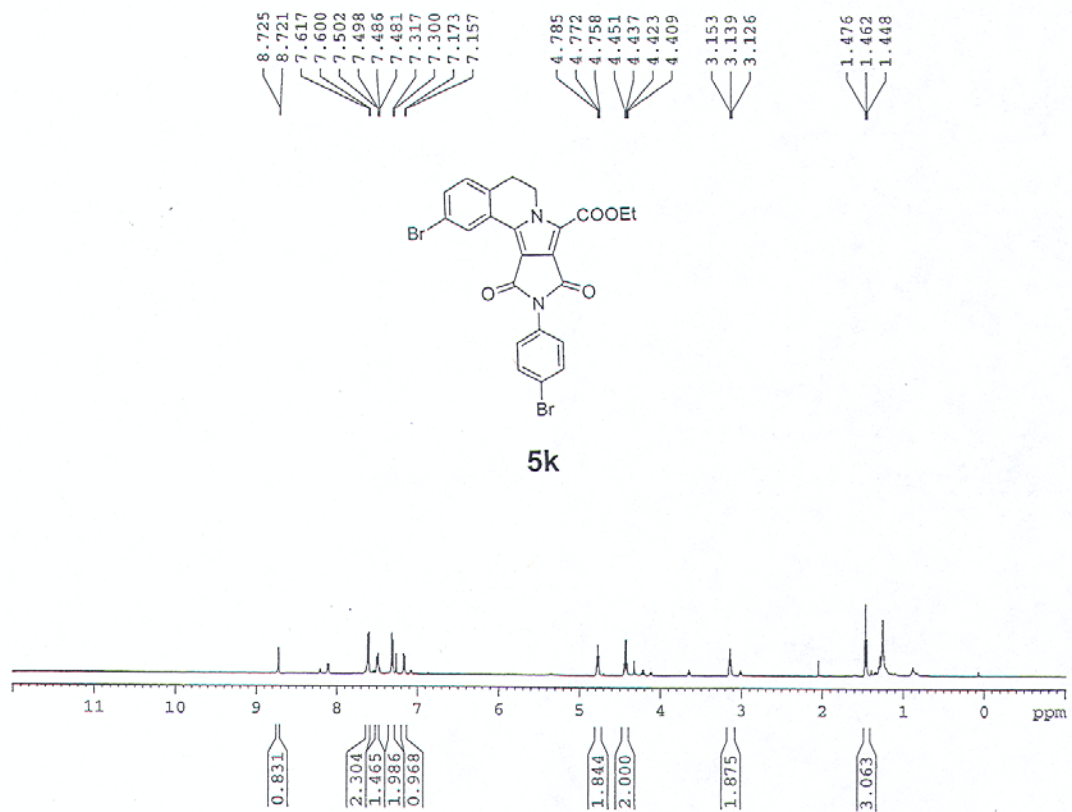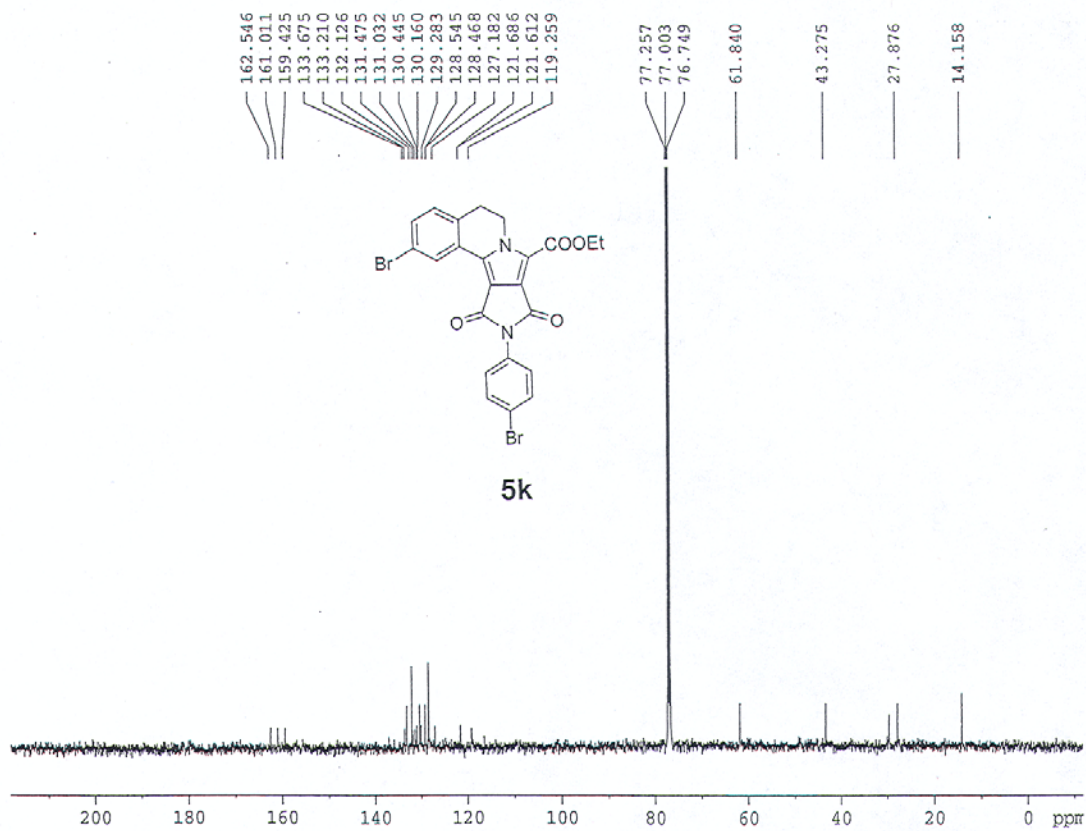

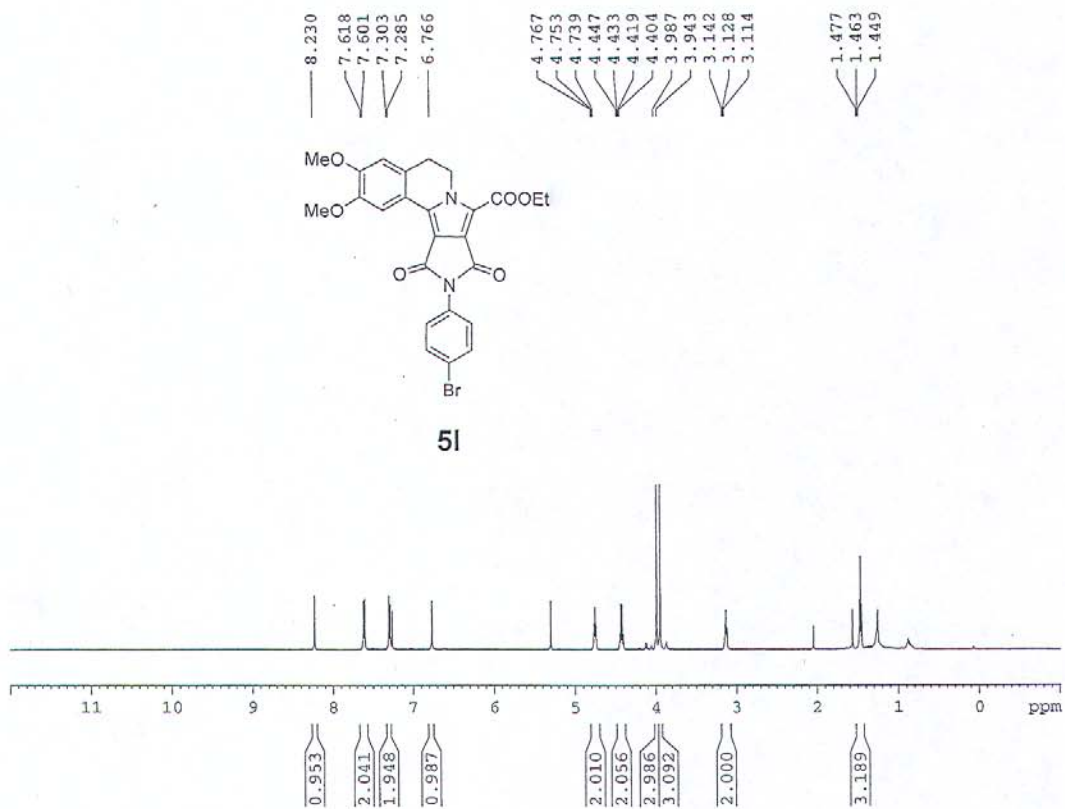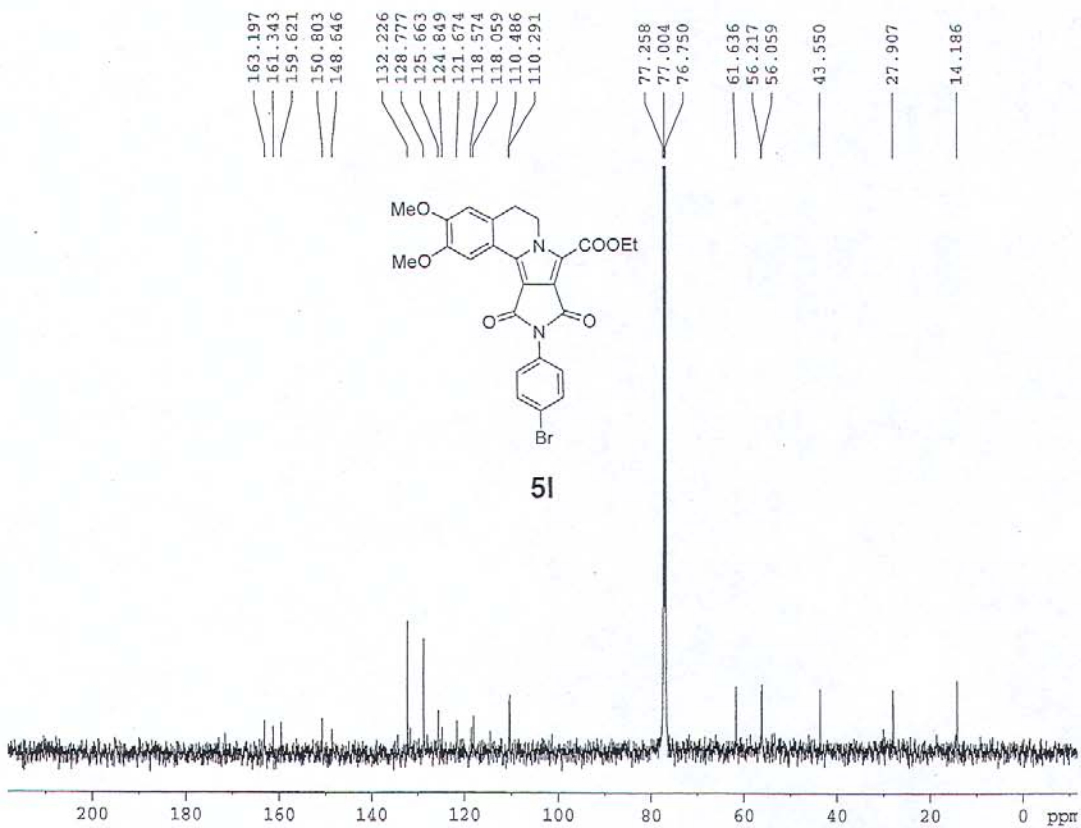

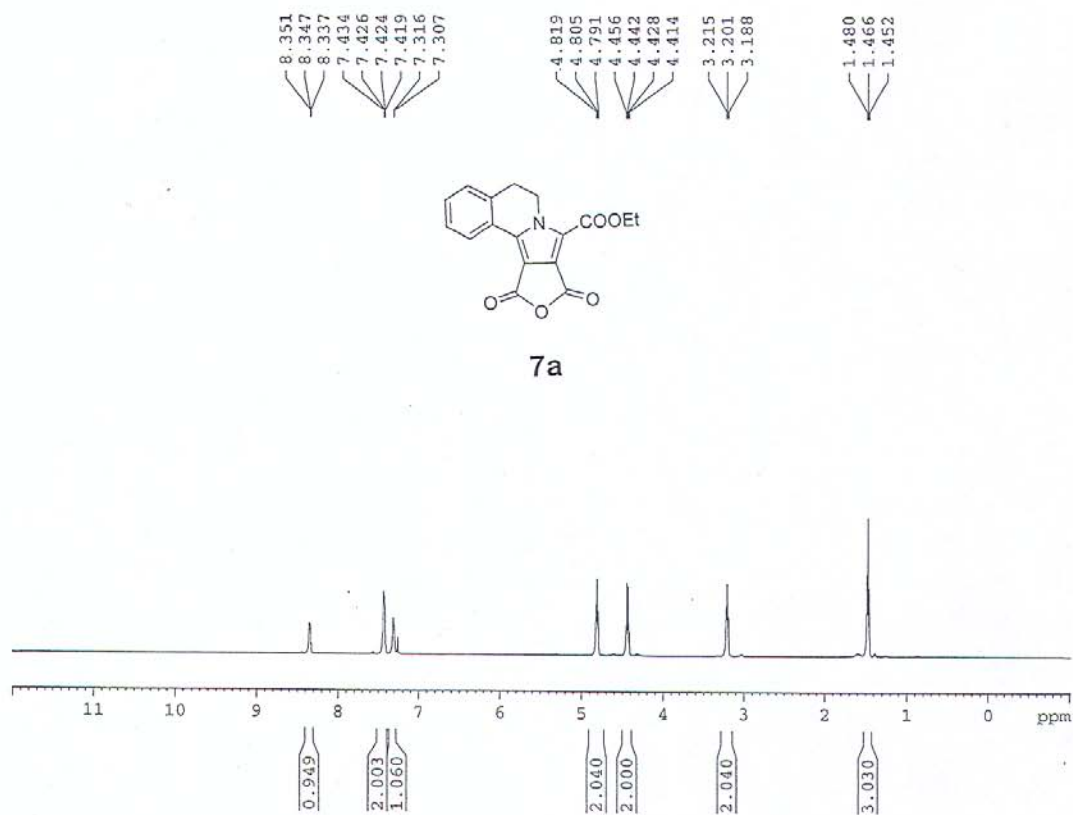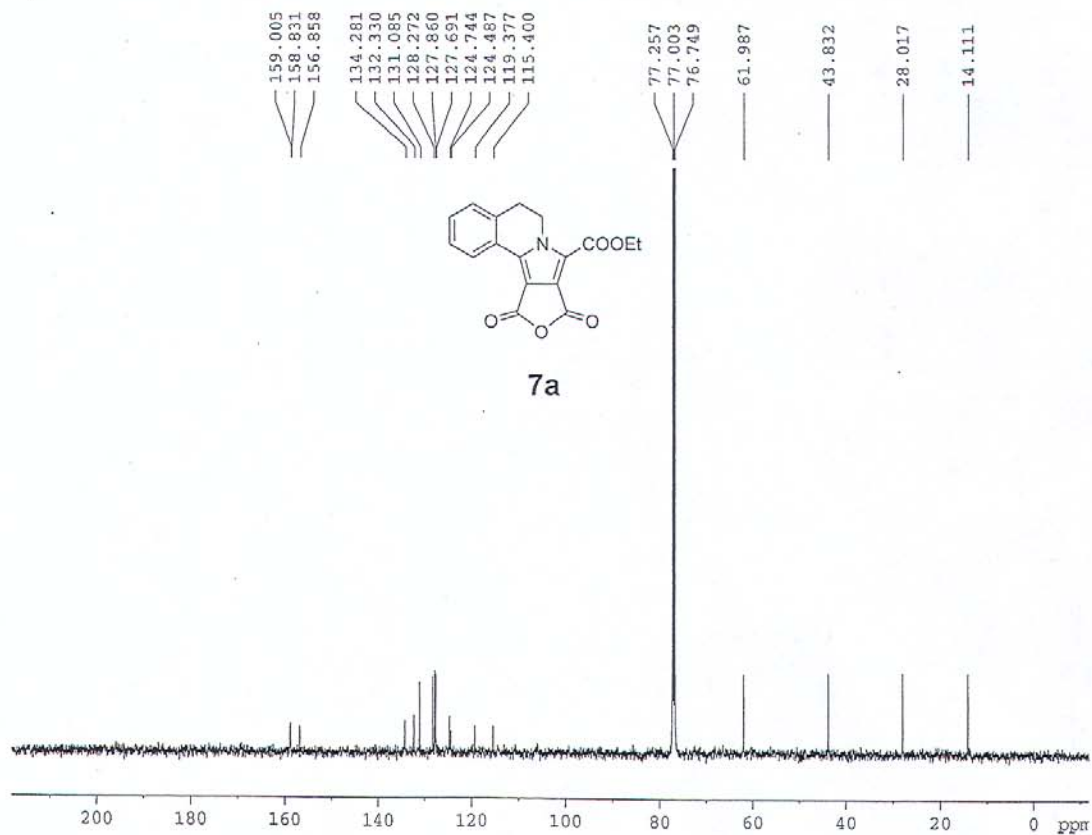



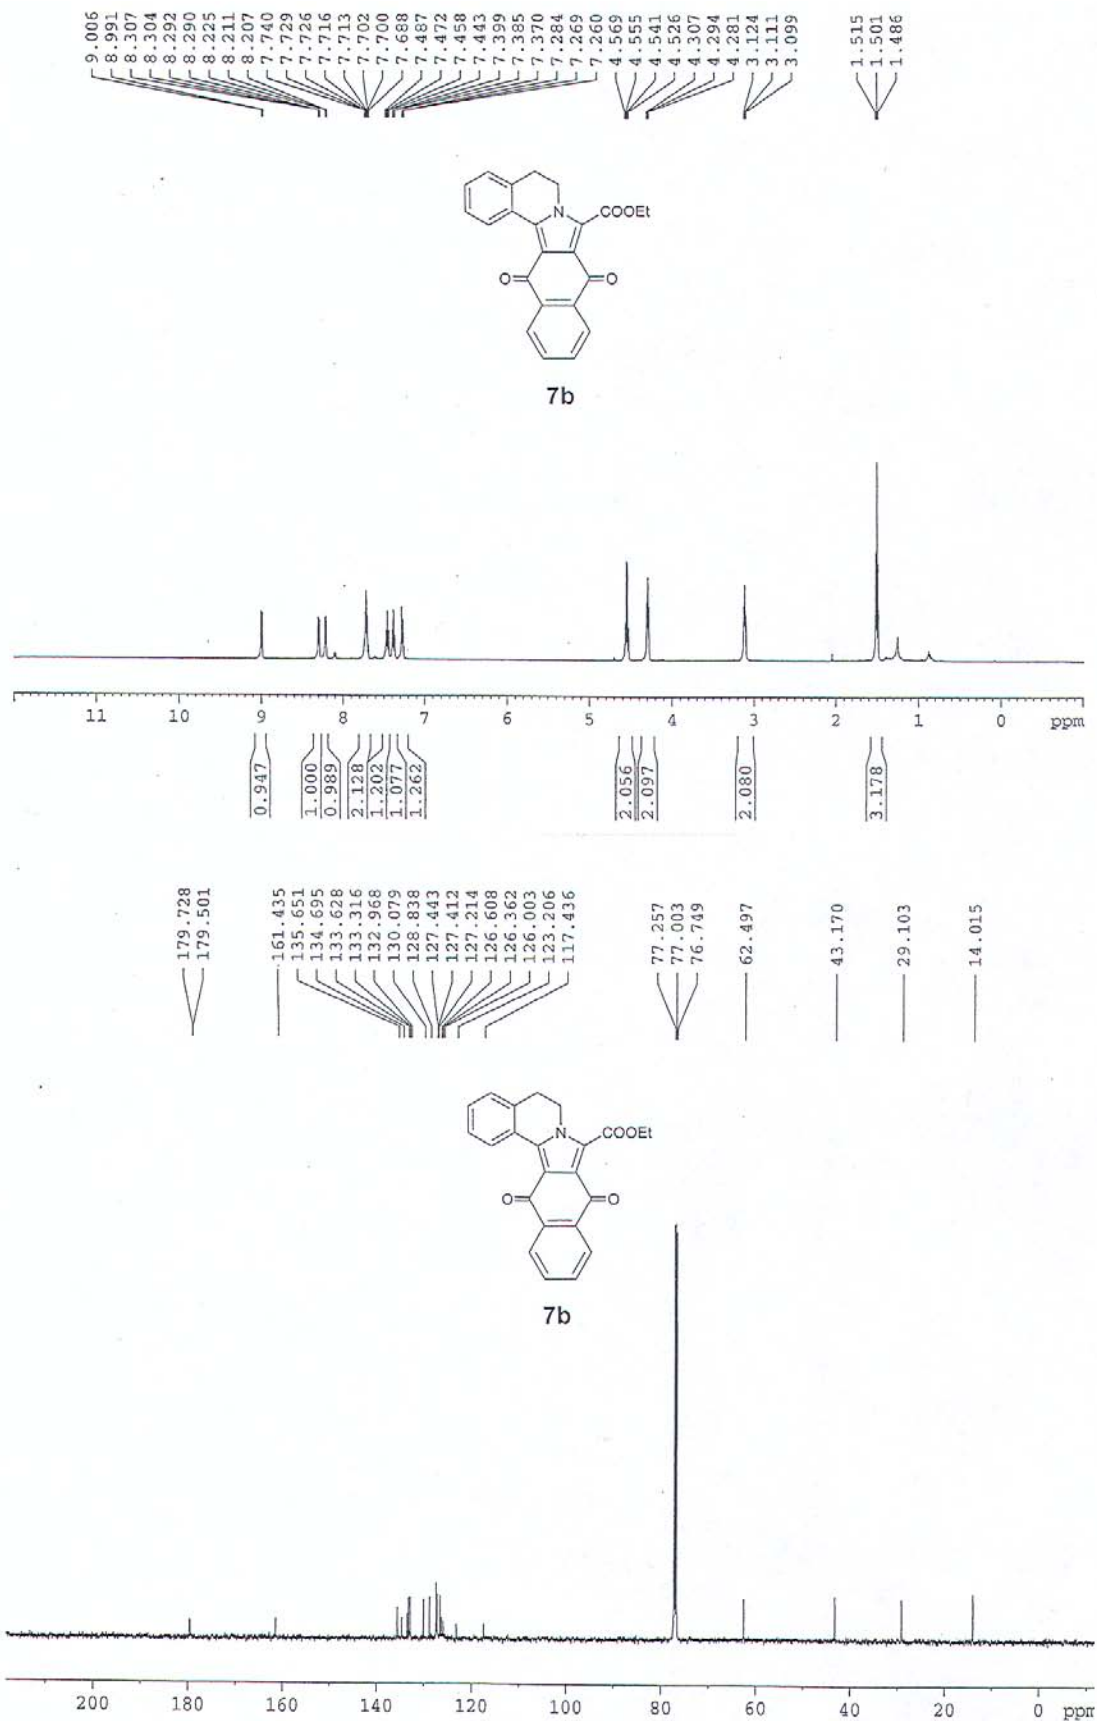

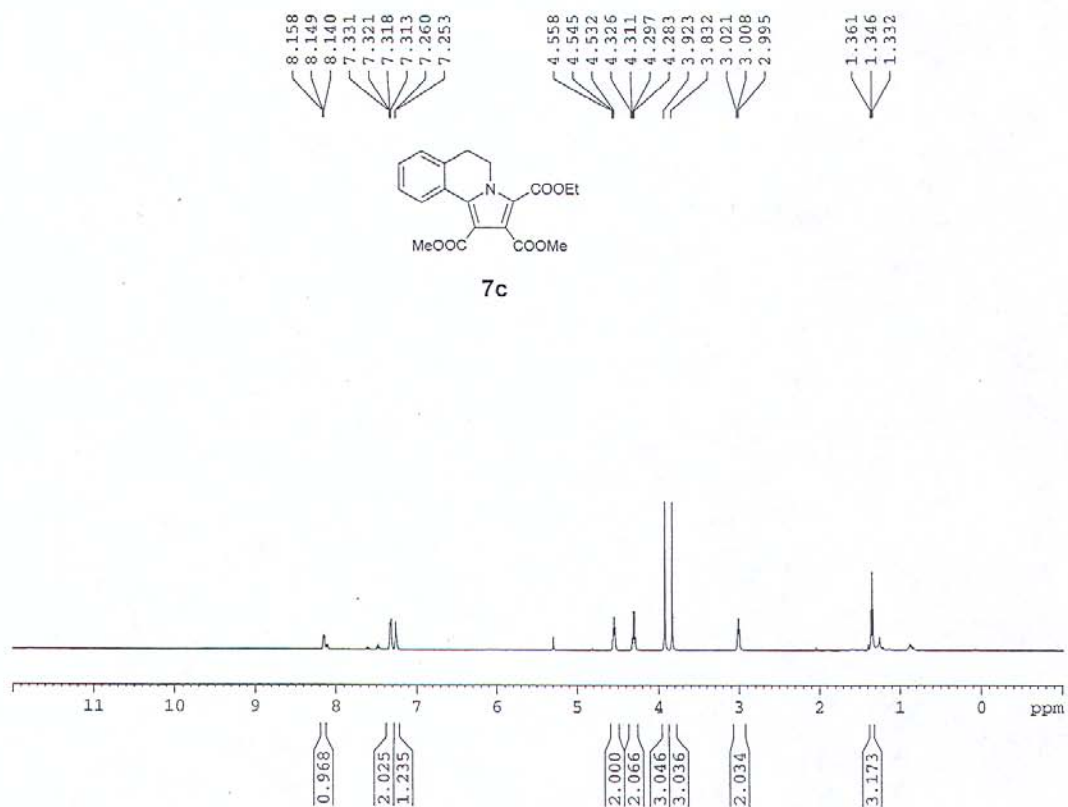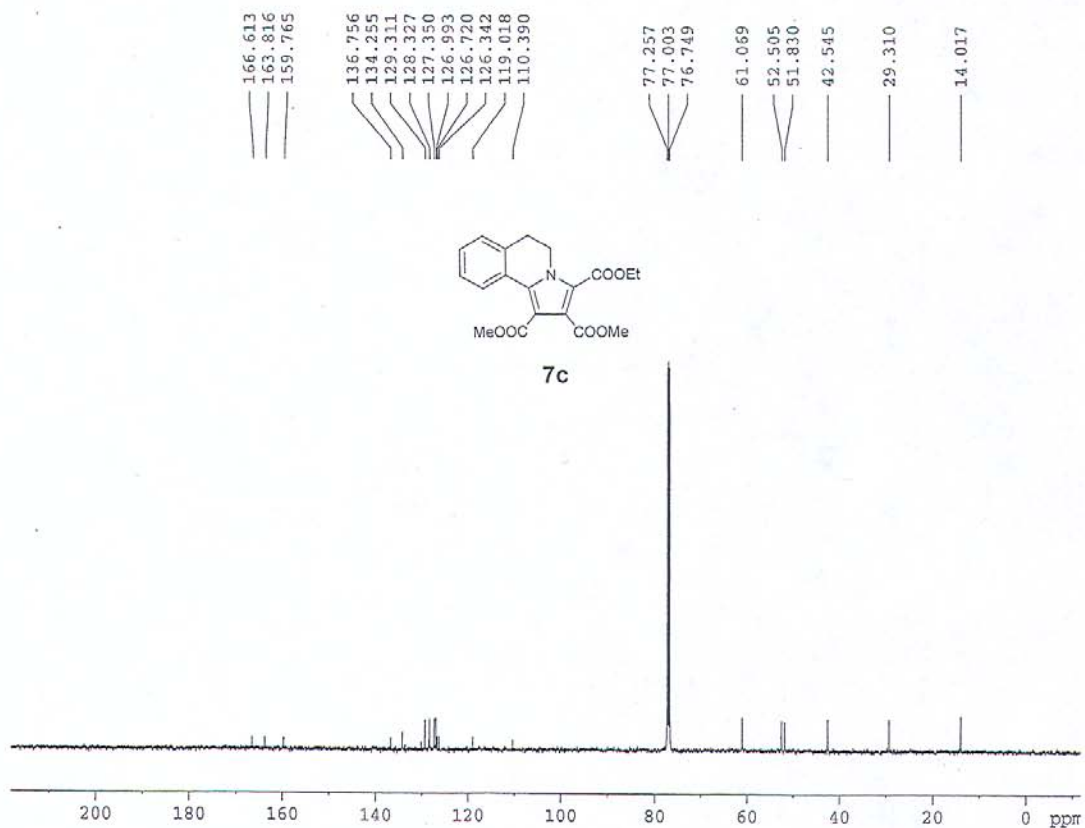

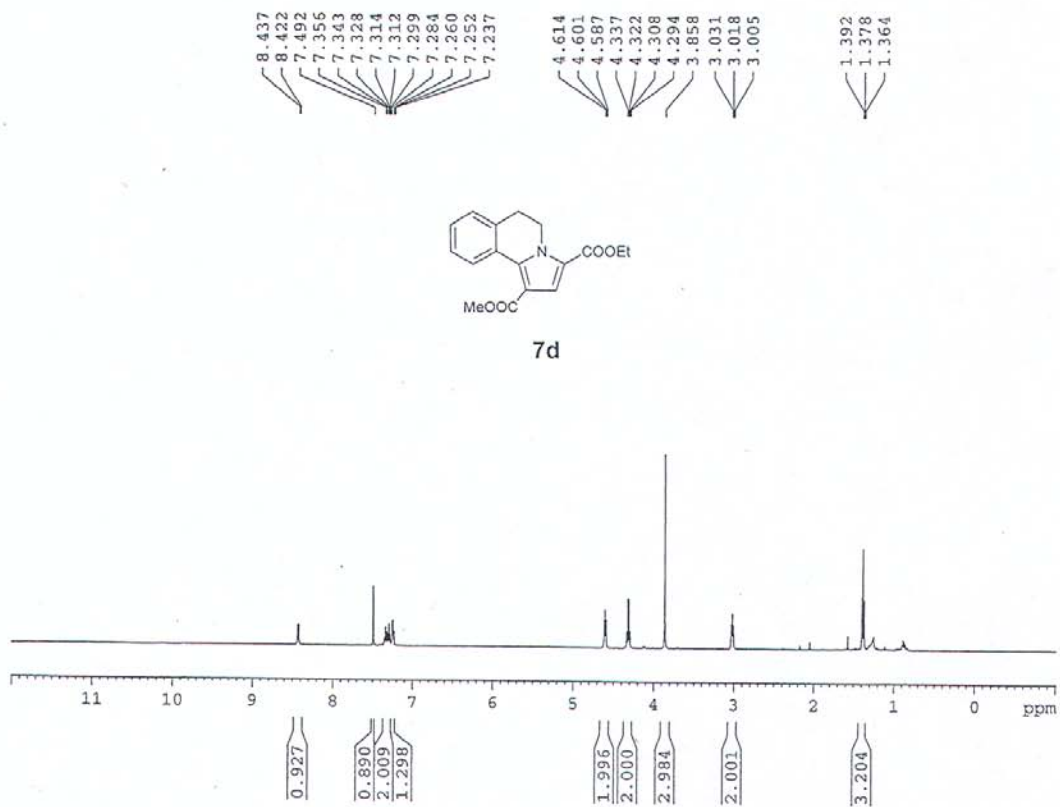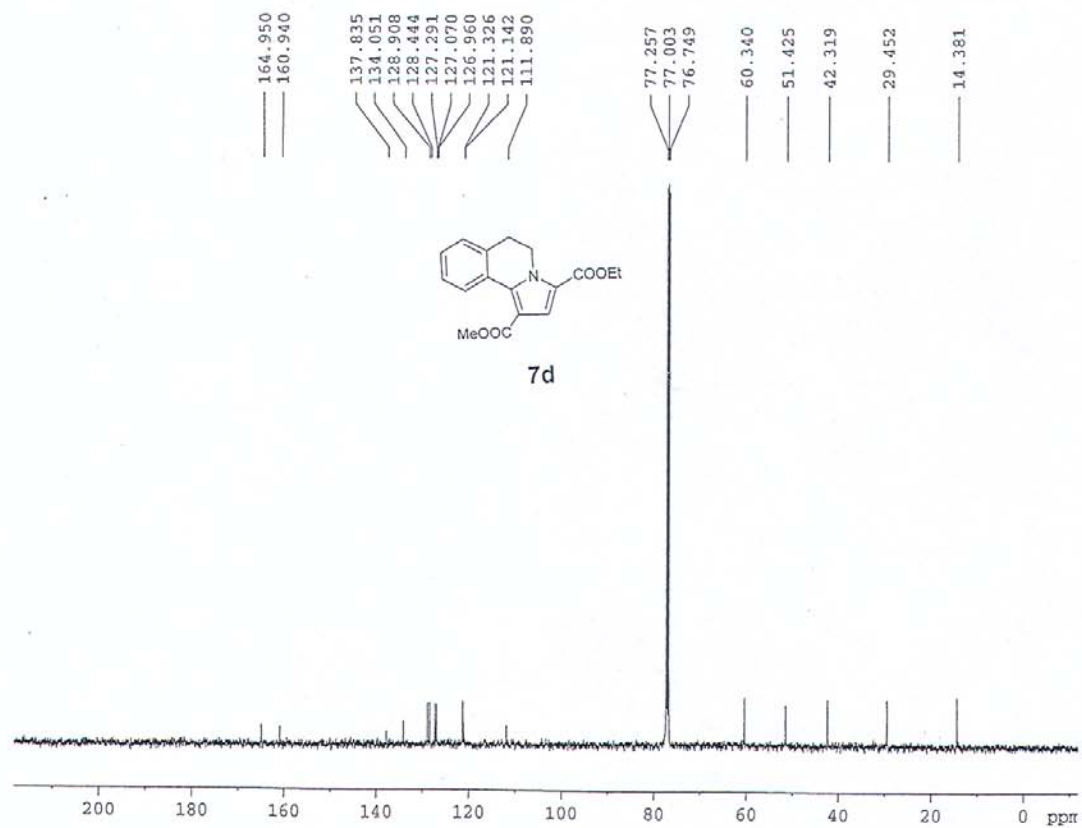



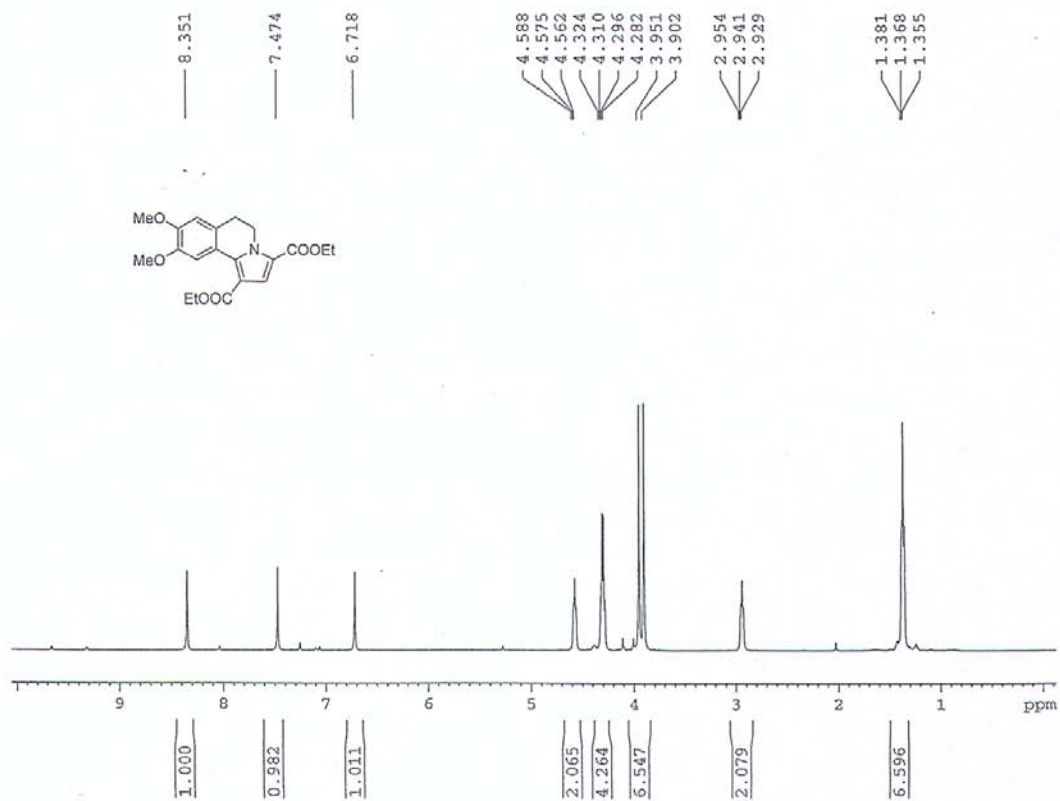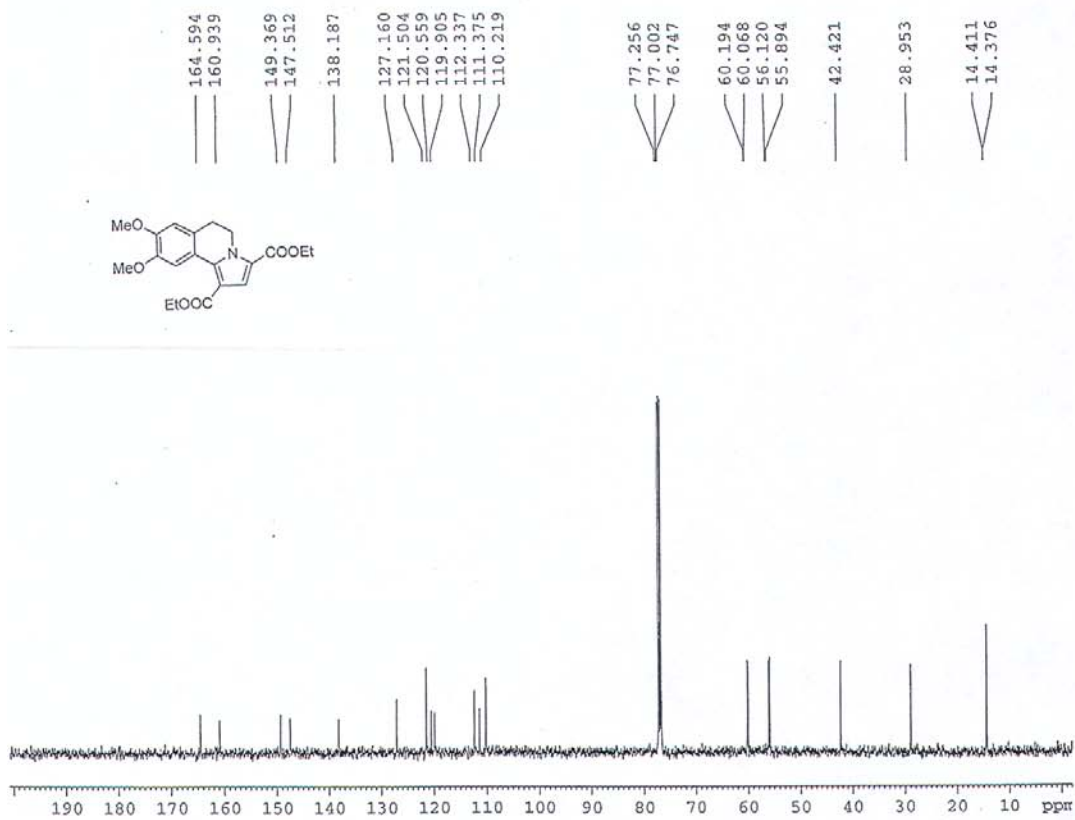

Supplement: c0cc03186k.pdf [file c0cc03186k.pdf]
